# Supplementary material
Source: publisher figshare collection journal article supplement (https://acs.figshare.com/ndownloader/files/4190089)
Supplement: Supplementary file 1 [file 4190089]

 
data_2
 
_audit_creation_method            SHELXL-97 

_publ_contact_author_name         'Martin Cowie'
_publ_contact_author_address
; Department of Chemistry
  University of Alberta
  Edmonton, Alberta T6G 2G2
  Canada
;
_publ_contact_author_email        martin.cowie@ualberta.ca
_publ_contact_author_fax          '1(780)4928231'
_publ_contact_author_phone        '1(780)4925581'
_publ_contact_letter
; To: Cambridge Crystallographic Data Centre
  Please accept the following CIF data for a structure we hope to
  publish in Organometallics.  Please forward any questions
  concerning this CIF to Bob McDonald (Bob.McDonald@ualberta.ca).
;
_publ_requested_journal
 'Organometallics'
_publ_section_title
;
C-F bond activation of fluoroolefins promoted by a
bis(diethylphosphino)methane-bridged diiridium hydride complex: role of
water in the activation processes
;
loop_
_publ_author_name
_publ_author_footnote
_publ_author_address
 'Slaney, Michael E.' .
; Department of Chemistry
  University of Alberta
  Edmonton, Alberta T6G 2G2
  Canada
;
 'Ferguson, Michael J.' 'X-ray Crystallography Laboratory'
; Department of Chemistry
  University of Alberta
  Edmonton, Alberta T6G 2G2
  Canada
;
 'McDonald, Robert' 'X-ray Crystallography Laboratory'
; Department of Chemistry
  University of Alberta
  Edmonton, Alberta T6G 2G2
  Canada
;
 'Cowie, Martin' .
; Department of Chemistry
  University of Alberta
  Edmonton, Alberta T6G 2G2
  Canada
;

_chemical_name_systematic 
; 
 ? 
; 
_chemical_name_common             ? 
_chemical_melting_point           ? 
_chemical_formula_moiety
 'C23 H47 Ir2 O3 P4, C32 H12 B F24' 
_chemical_formula_sum 
 'C55 H59 B F24 Ir2 O3 P4' 
_chemical_formula_weight          1743.11 
 
loop_ 
 _atom_type_symbol 
 _atom_type_description 
 _atom_type_scat_dispersion_real 
 _atom_type_scat_dispersion_imag 
 _atom_type_scat_source 
 'C'  'C'   0.0033   0.0016 
 'International Tables Vol C Tables 4.2.6.8 and 6.1.1.4' 
 'H'  'H'   0.0000   0.0000 
 'International Tables Vol C Tables 4.2.6.8 and 6.1.1.4' 
 'B'  'B'   0.0013   0.0007 
 'International Tables Vol C Tables 4.2.6.8 and 6.1.1.4' 
 'O'  'O'   0.0106   0.0060 
 'International Tables Vol C Tables 4.2.6.8 and 6.1.1.4' 
 'F'  'F'   0.0171   0.0103 
 'International Tables Vol C Tables 4.2.6.8 and 6.1.1.4' 
 'P'  'P'   0.1023   0.0942 
 'International Tables Vol C Tables 4.2.6.8 and 6.1.1.4' 
 'Ir'  'Ir'  -1.4442   7.9887 
 'International Tables Vol C Tables 4.2.6.8 and 6.1.1.4' 
 
_symmetry_cell_setting            Triclinic 
_symmetry_space_group_name_H-M    'P -1' 
_symmetry_space_group_name_Hall   '-P 1' 
 
loop_ 
 _symmetry_equiv_pos_as_xyz 
 'x, y, z' 
 '-x, -y, -z' 
 
_cell_length_a                    12.5007(16) 
_cell_length_b                    14.6611(18) 
_cell_length_c                    18.491(2) 
_cell_angle_alpha                 76.3985(15) 
_cell_angle_beta                  84.0521(16) 
_cell_angle_gamma                 86.3437(16) 
_cell_volume                      3273.5(7) 
_cell_formula_units_Z             2 
_cell_measurement_temperature     173(2) 
_cell_measurement_reflns_used     7504 
_cell_measurement_theta_min       2.18 
_cell_measurement_theta_max       23.11 
 
_exptl_crystal_description        fragment 
_exptl_crystal_colour             yellow 
_exptl_crystal_size_max           0.41 
_exptl_crystal_size_mid           0.29 
_exptl_crystal_size_min           0.18 
_exptl_crystal_density_meas       ? 
_exptl_crystal_density_diffrn     1.768 
_exptl_crystal_density_method     'not measured' 
_exptl_crystal_F_000              1696 
_exptl_absorpt_coefficient_mu     4.268 
_exptl_absorpt_correction_type    integration 
_exptl_absorpt_correction_T_min   0.2729 
_exptl_absorpt_correction_T_max   0.5155 
_exptl_absorpt_process_details    'SADABS (Sheldrick, 2008)' 
 
_exptl_special_details 
; 
 ? 
; 
 
_diffrn_ambient_temperature       173(2) 
_diffrn_radiation_wavelength      0.71073 
_diffrn_radiation_type            MoK\a 
_diffrn_radiation_source          'fine-focus sealed tube' 
_diffrn_radiation_monochromator   graphite 
_diffrn_measurement_device_type   'Bruker APEX-II CCD' 
_diffrn_measurement_method        '\w scans' 
_diffrn_detector_area_resol_mean  ? 
_diffrn_reflns_number             29059 
_diffrn_reflns_av_R_equivalents   0.0144 
_diffrn_reflns_av_sigmaI/netI     0.0213 
_diffrn_reflns_limit_h_min        -16 
_diffrn_reflns_limit_h_max        16 
_diffrn_reflns_limit_k_min        -19 
_diffrn_reflns_limit_k_max        19 
_diffrn_reflns_limit_l_min        -23 
_diffrn_reflns_limit_l_max        24 
_diffrn_reflns_theta_min          1.64 
_diffrn_reflns_theta_max          27.54 
_reflns_number_total              14991 
_reflns_number_gt                 13501 
_reflns_threshold_expression      I>2\s(I) 
 
_computing_data_collection        'Bruker APEX2' 
_computing_cell_refinement        'Bruker SAINT' 
_computing_data_reduction         'Bruker SAINT' 
_computing_structure_solution     'DIRDIF-2008 (Beurskens et al., 2008)' 
_computing_structure_refinement   'SHELXL-97 (Sheldrick, 2008)' 
_computing_molecular_graphics     'Bruker SHELXTL' 
_computing_publication_material   'Bruker SHELXTL' 
 
_refine_special_details 
; 
 Refinement of F^2^ against ALL reflections.  The weighted R-factor wR and 
 goodness of fit S are based on F^2^, conventional R-factors R are based 
 on F, with F set to zero for negative F^2^. The threshold expression of 
 F^2^ > 2sigma(F^2^) is used only for calculating R-factors(gt) etc. and is 
 not relevant to the choice of reflections for refinement.  R-factors based 
 on F^2^ are statistically about twice as large as those based on F, and R- 
 factors based on ALL data will be even larger. 
; 
 
_refine_ls_structure_factor_coef  Fsqd 
_refine_ls_matrix_type            full 
_refine_ls_weighting_scheme       calc 
_refine_ls_weighting_details 
 'calc w=1/[\s^2^(Fo^2^)+(0.0258P)^2^+4.3209P] where P=(Fo^2^+2Fc^2^)/3' 
_atom_sites_solution_primary      direct 
_atom_sites_solution_secondary    difmap 
_atom_sites_solution_hydrogens    geom 
_refine_ls_hydrogen_treatment     mixed 
_refine_ls_extinction_method      none 
_refine_ls_extinction_coef        ? 
_refine_ls_number_reflns          14991 
_refine_ls_number_parameters      889 
_refine_ls_number_restraints      13 
_refine_ls_R_factor_all           0.0266 
_refine_ls_R_factor_gt            0.0229 
_refine_ls_wR_factor_ref          0.0578 
_refine_ls_wR_factor_gt           0.0560 
_refine_ls_goodness_of_fit_ref    1.023 
_refine_ls_restrained_S_all       1.026 
_refine_ls_shift/su_max           0.003 
_refine_ls_shift/su_mean          0.000 
 
loop_ 
 _atom_site_label 
 _atom_site_type_symbol 
 _atom_site_fract_x 
 _atom_site_fract_y 
 _atom_site_fract_z 
 _atom_site_U_iso_or_equiv 
 _atom_site_adp_type 
 _atom_site_occupancy 
 _atom_site_symmetry_multiplicity 
 _atom_site_calc_flag 
 _atom_site_refinement_flags 
 _atom_site_disorder_assembly 
 _atom_site_disorder_group 
Ir1 Ir 0.046604(8) 0.037757(7) 0.270060(6) 0.02609(3) Uani 1 1 d D . . 
Ir2 Ir 0.257812(8) 0.092053(7) 0.266584(6) 0.02402(3) Uani 1 1 d . . . 
H1 H -0.038(3) -0.002(3) 0.232(2) 0.086(15) Uiso 1 1 d D . . 
P1 P -0.00283(6) 0.17029(5) 0.18373(4) 0.02812(14) Uani 1 1 d . . . 
P2 P 0.22979(6) 0.22472(5) 0.16998(4) 0.02730(14) Uani 1 1 d . . . 
P3 P 0.07431(6) -0.11633(5) 0.33182(4) 0.02995(15) Uani 1 1 d . . . 
P4 P 0.28822(6) -0.04908(5) 0.35437(4) 0.02797(14) Uani 1 1 d . . . 
O1 O -0.0819(3) 0.0958(2) 0.40219(15) 0.0686(8) Uani 1 1 d . . . 
O2 O 0.1811(2) 0.1988(2) 0.38821(15) 0.0614(7) Uani 1 1 d . . . 
O3 O 0.49687(19) 0.09323(18) 0.21502(17) 0.0558(7) Uani 1 1 d . . . 
C1 C -0.0373(3) 0.0733(2) 0.35153(18) 0.0411(7) Uani 1 1 d . . . 
C2 C 0.2128(3) 0.1593(2) 0.34384(18) 0.0384(7) Uani 1 1 d . . . 
C3 C 0.4065(2) 0.0928(2) 0.23361(18) 0.0365(7) Uani 1 1 d . . . 
C4 C 0.1802(2) 0.01821(19) 0.20207(16) 0.0294(6) Uani 1 1 d . . . 
C5 C 0.2167(3) -0.0191(2) 0.14483(18) 0.0390(7) Uani 1 1 d . . . 
H5A H 0.1692 -0.0504 0.1228 0.047 Uiso 1 1 calc R . . 
H5B H 0.2903 -0.0145 0.1260 0.047 Uiso 1 1 calc R . . 
C6 C 0.1116(2) 0.2218(2) 0.12161(16) 0.0311(6) Uani 1 1 d . . . 
H6A H 0.1298 0.1851 0.0830 0.037 Uiso 1 1 calc R . . 
H6B H 0.0907 0.2866 0.0958 0.037 Uiso 1 1 calc R . . 
C7 C 0.2165(2) -0.14659(19) 0.34085(16) 0.0309(6) Uani 1 1 d . . . 
H7A H 0.2241 -0.2007 0.3838 0.037 Uiso 1 1 calc R . . 
H7B H 0.2492 -0.1657 0.2953 0.037 Uiso 1 1 calc R . . 
C11 C -0.0676(2) 0.2644(2) 0.2240(2) 0.0386(7) Uani 1 1 d . . . 
H11A H -0.1375 0.2424 0.2505 0.046 Uiso 1 1 calc R . . 
H11B H -0.0224 0.2751 0.2618 0.046 Uiso 1 1 calc R . . 
C12 C -0.0883(3) 0.3583(2) 0.1701(2) 0.0498(9) Uani 1 1 d . . . 
H12A H -0.1239 0.4028 0.1978 0.060 Uiso 1 1 calc R . . 
H12B H -0.1347 0.3496 0.1328 0.060 Uiso 1 1 calc R . . 
H12C H -0.0198 0.3829 0.1449 0.060 Uiso 1 1 calc R . . 
C13 C -0.0978(3) 0.1545(2) 0.1190(2) 0.0440(8) Uani 1 1 d . . . 
H13A H -0.1671 0.1357 0.1480 0.053 Uiso 1 1 calc R . . 
H13B H -0.1108 0.2158 0.0841 0.053 Uiso 1 1 calc R . . 
C14 C -0.0617(4) 0.0823(3) 0.0734(2) 0.0621(11) Uani 1 1 d . . . 
H14A H -0.1176 0.0780 0.0411 0.075 Uiso 1 1 calc R . . 
H14B H -0.0496 0.0210 0.1072 0.075 Uiso 1 1 calc R . . 
H14C H 0.0053 0.1015 0.0427 0.075 Uiso 1 1 calc R . . 
C21 C 0.3377(2) 0.2397(2) 0.09392(18) 0.0387(7) Uani 1 1 d . . . 
H21A H 0.4052 0.2499 0.1141 0.046 Uiso 1 1 calc R . . 
H21B H 0.3482 0.1805 0.0766 0.046 Uiso 1 1 calc R . . 
C22 C 0.3197(3) 0.3202(3) 0.0265(2) 0.0518(9) Uani 1 1 d . . . 
H22A H 0.3819 0.3226 -0.0108 0.062 Uiso 1 1 calc R . . 
H22B H 0.3111 0.3797 0.0423 0.062 Uiso 1 1 calc R . . 
H22C H 0.2547 0.3099 0.0045 0.062 Uiso 1 1 calc R . . 
C23 C 0.2163(3) 0.3372(2) 0.19702(19) 0.0375(7) Uani 1 1 d . . . 
H23A H 0.1972 0.3869 0.1533 0.045 Uiso 1 1 calc R . . 
H23B H 0.1560 0.3346 0.2366 0.045 Uiso 1 1 calc R . . 
C24 C 0.3170(3) 0.3648(3) 0.2254(3) 0.0548(10) Uani 1 1 d . . . 
H24A H 0.3030 0.4252 0.2394 0.066 Uiso 1 1 calc R . . 
H24B H 0.3766 0.3702 0.1860 0.066 Uiso 1 1 calc R . . 
H24C H 0.3361 0.3166 0.2692 0.066 Uiso 1 1 calc R . . 
C31 C 0.0051(3) -0.1500(2) 0.42561(18) 0.0405(7) Uani 1 1 d . . . 
H31A H 0.0261 -0.1069 0.4552 0.049 Uiso 1 1 calc R . . 
H31B H -0.0733 -0.1396 0.4213 0.049 Uiso 1 1 calc R . . 
C32 C 0.0251(4) -0.2500(3) 0.4693(2) 0.0613(11) Uani 1 1 d . . . 
H32A H -0.0144 -0.2590 0.5190 0.074 Uiso 1 1 calc R . . 
H32B H 0.1023 -0.2618 0.4746 0.074 Uiso 1 1 calc R . . 
H32C H 0.0003 -0.2939 0.4427 0.074 Uiso 1 1 calc R . . 
C33 C 0.0375(3) -0.2033(2) 0.2833(2) 0.0404(7) Uani 1 1 d . . . 
H33A H 0.0750 -0.1900 0.2324 0.049 Uiso 1 1 calc R . . 
H33B H 0.0634 -0.2663 0.3100 0.049 Uiso 1 1 calc R . . 
C34 C -0.0825(3) -0.2057(3) 0.2773(3) 0.0577(10) Uani 1 1 d . . . 
H34A H -0.0956 -0.2525 0.2494 0.069 Uiso 1 1 calc R . . 
H34B H -0.1092 -0.1437 0.2511 0.069 Uiso 1 1 calc R . . 
H34C H -0.1202 -0.2225 0.3275 0.069 Uiso 1 1 calc R . . 
C41 C 0.2506(3) -0.0454(2) 0.45221(16) 0.0384(7) Uani 1 1 d . . . 
H41A H 0.1790 -0.0130 0.4559 0.046 Uiso 1 1 calc R . . 
H41B H 0.2443 -0.1105 0.4825 0.046 Uiso 1 1 calc R . . 
C42 C 0.3305(3) 0.0044(3) 0.4849(2) 0.0520(9) Uani 1 1 d . . . 
H42A H 0.3061 0.0034 0.5372 0.062 Uiso 1 1 calc R . . 
H42B H 0.3355 0.0696 0.4564 0.062 Uiso 1 1 calc R . . 
H42C H 0.4015 -0.0278 0.4823 0.062 Uiso 1 1 calc R . . 
C43 C 0.4272(3) -0.0959(2) 0.35595(19) 0.0388(7) Uani 1 1 d . . . 
H43A H 0.4743 -0.0450 0.3581 0.047 Uiso 1 1 calc R . . 
H43B H 0.4329 -0.1456 0.4022 0.047 Uiso 1 1 calc R . . 
C44 C 0.4685(3) -0.1364(3) 0.2893(2) 0.0482(8) Uani 1 1 d . . . 
H44A H 0.5431 -0.1599 0.2944 0.058 Uiso 1 1 calc R . . 
H44B H 0.4651 -0.0874 0.2433 0.058 Uiso 1 1 calc R . . 
H44C H 0.4237 -0.1882 0.2874 0.058 Uiso 1 1 calc R . . 
F51 F 0.5488(3) 0.4121(2) 0.03700(15) 0.0921(10) Uani 1 1 d . . . 
F52 F 0.6158(3) 0.27800(18) 0.06602(14) 0.0842(9) Uani 1 1 d . . . 
F53 F 0.7159(2) 0.3948(3) 0.03335(14) 0.1078(13) Uani 1 1 d . . . 
F54 F 0.6443(3) 0.23606(15) 0.40786(13) 0.0742(8) Uani 1 1 d . . . 
F55 F 0.5224(2) 0.18454(17) 0.35881(14) 0.0700(7) Uani 1 1 d . . . 
F56 F 0.6856(2) 0.15128(14) 0.32880(13) 0.0658(7) Uani 1 1 d . . . 
F61 F 0.7615(2) 0.7096(2) 0.47699(16) 0.0761(8) Uani 1 1 d . . . 
F62 F 0.6181(3) 0.7439(3) 0.5334(2) 0.144(2) Uani 1 1 d . . . 
F63 F 0.6720(3) 0.8246(2) 0.4258(2) 0.1251(15) Uani 1 1 d . . . 
F64 F 0.26615(16) 0.62905(16) 0.40878(16) 0.0696(7) Uani 1 1 d . . . 
F65 F 0.31330(16) 0.48570(14) 0.43857(14) 0.0555(5) Uani 1 1 d . . . 
F66 F 0.3094(2) 0.5663(2) 0.51999(14) 0.0818(9) Uani 1 1 d . . . 
F71A F 0.9650(7) 0.4660(8) 0.4190(4) 0.084(3) Uani 0.50 1 d PD A 1 
F72A F 1.0728(10) 0.4101(6) 0.3526(5) 0.096(5) Uani 0.50 1 d PD A 1 
F73A F 1.0938(11) 0.5451(6) 0.3675(8) 0.127(5) Uani 0.50 1 d PD A 1 
F74A F 0.9604(9) 0.5962(9) 0.0336(5) 0.068(3) Uani 0.50 1 d PD B 1 
F75A F 1.1107(7) 0.5901(11) 0.0718(8) 0.157(8) Uani 0.50 1 d PD B 1 
F76A F 1.0071(15) 0.7141(5) 0.0551(8) 0.168(7) Uani 0.50 1 d PD B 1 
F71B F 1.1289(4) 0.4971(11) 0.3381(5) 0.107(3) Uani 0.50 1 d PD A 2 
F72B F 0.9967(12) 0.5210(12) 0.4124(6) 0.141(7) Uani 0.50 1 d PD A 2 
F73B F 1.0193(13) 0.3995(4) 0.3696(9) 0.142(7) Uani 0.50 1 d PD A 2 
F74B F 1.0648(7) 0.7017(5) 0.0748(8) 0.098(4) Uani 0.50 1 d PD B 2 
F75B F 0.9529(8) 0.6307(13) 0.0287(6) 0.137(8) Uani 0.50 1 d PD B 2 
F76B F 1.0945(6) 0.5613(6) 0.0752(6) 0.066(2) Uani 0.50 1 d PD B 2 
F81 F 0.26154(17) 0.7344(2) 0.18328(13) 0.0668(7) Uani 1 1 d . . . 
F82 F 0.30599(18) 0.64282(18) 0.10970(14) 0.0633(6) Uani 1 1 d . . . 
F83 F 0.28726(19) 0.79110(19) 0.06525(13) 0.0675(7) Uani 1 1 d . . . 
F84A F 0.6823(14) 0.9580(11) 0.1336(7) 0.110(6) Uani 0.50 1 d P C 1 
F85A F 0.6083(10) 0.9763(8) 0.0321(7) 0.106(5) Uani 0.50 1 d P C 1 
F86A F 0.7500(8) 0.8992(9) 0.0463(9) 0.088(4) Uani 0.50 1 d P C 1 
F84B F 0.7023(11) 0.9413(10) 0.1369(8) 0.086(4) Uani 0.50 1 d P C 2 
F85B F 0.5790(11) 0.9903(7) 0.0699(7) 0.114(4) Uani 0.50 1 d P C 2 
F86B F 0.7188(14) 0.9158(10) 0.0305(8) 0.146(8) Uani 0.50 1 d P C 2 
C51 C 0.6307(2) 0.47683(18) 0.23650(15) 0.0253(5) Uani 1 1 d . . . 
C52 C 0.6274(2) 0.4630(2) 0.16476(15) 0.0275(5) Uani 1 1 d . . . 
H52 H 0.6275 0.5161 0.1238 0.033 Uiso 1 1 calc R . . 
C53 C 0.6239(2) 0.3738(2) 0.15114(16) 0.0294(6) Uani 1 1 d . . . 
C54 C 0.6218(2) 0.2947(2) 0.20914(17) 0.0324(6) Uani 1 1 d . . . 
H54 H 0.6194 0.2339 0.1998 0.039 Uiso 1 1 calc R . . 
C55 C 0.6232(2) 0.30637(19) 0.28132(16) 0.0301(6) Uani 1 1 d . . . 
C56 C 0.6278(2) 0.39566(19) 0.29480(15) 0.0283(6) Uani 1 1 d . . . 
H56 H 0.6289 0.4018 0.3447 0.034 Uiso 1 1 calc R . . 
C57 C 0.6280(3) 0.3647(2) 0.07214(18) 0.0385(7) Uani 1 1 d . . . 
C58 C 0.6205(3) 0.2210(2) 0.34396(19) 0.0414(7) Uani 1 1 d . . . 
C61 C 0.6041(2) 0.59754(18) 0.33010(15) 0.0254(5) Uani 1 1 d . . . 
C62 C 0.6527(2) 0.65380(19) 0.36761(16) 0.0297(6) Uani 1 1 d . . . 
H62 H 0.7223 0.6759 0.3490 0.036 Uiso 1 1 calc R . . 
C63 C 0.6024(2) 0.6785(2) 0.43127(17) 0.0339(6) Uani 1 1 d . . . 
C64 C 0.5003(2) 0.6501(2) 0.45935(17) 0.0332(6) Uani 1 1 d . . . 
H64 H 0.4659 0.6673 0.5027 0.040 Uiso 1 1 calc R . . 
C65 C 0.4495(2) 0.59573(19) 0.42248(16) 0.0293(6) Uani 1 1 d . . . 
C66 C 0.5008(2) 0.56893(19) 0.35985(15) 0.0271(5) Uani 1 1 d . . . 
H66 H 0.4647 0.5301 0.3366 0.032 Uiso 1 1 calc R . . 
C67 C 0.6614(3) 0.7388(3) 0.4680(2) 0.0531(9) Uani 1 1 d . . . 
C68 C 0.3353(2) 0.5693(2) 0.44761(18) 0.0376(7) Uani 1 1 d . . . 
C71 C 0.7881(2) 0.57807(17) 0.24028(15) 0.0250(5) Uani 1 1 d . . . 
C72 C 0.8500(2) 0.54049(19) 0.29974(16) 0.0290(6) Uani 1 1 d . . . 
H72 H 0.8149 0.5202 0.3485 0.035 Uiso 1 1 calc R . . 
C73 C 0.9619(2) 0.5319(2) 0.28964(17) 0.0323(6) Uani 1 1 d . A . 
C74 C 1.0165(2) 0.5604(2) 0.22000(18) 0.0368(7) Uani 1 1 d . . . 
H74 H 1.0929 0.5559 0.2136 0.044 Uiso 1 1 calc R . . 
C75 C 0.9569(2) 0.5956(2) 0.15969(17) 0.0346(6) Uani 1 1 d . B . 
C76 C 0.8452(2) 0.60436(19) 0.16973(16) 0.0291(6) Uani 1 1 d . . . 
H76 H 0.8063 0.6289 0.1274 0.035 Uiso 1 1 calc R . . 
C77 C 1.0247(3) 0.4893(2) 0.3549(2) 0.0497(9) Uani 1 1 d D . . 
C78 C 1.0136(3) 0.6230(3) 0.0828(2) 0.0622(11) Uani 1 1 d D . . 
C81 C 0.6009(2) 0.66612(19) 0.18977(15) 0.0275(5) Uani 1 1 d . . . 
C82 C 0.4955(2) 0.6603(2) 0.17325(16) 0.0307(6) Uani 1 1 d . . . 
H82 H 0.4600 0.6030 0.1919 0.037 Uiso 1 1 calc R . . 
C83 C 0.4408(2) 0.7365(2) 0.13008(17) 0.0354(7) Uani 1 1 d . . . 
C84 C 0.4902(3) 0.8204(2) 0.10031(17) 0.0411(8) Uani 1 1 d . . . 
H84 H 0.4533 0.8718 0.0701 0.049 Uiso 1 1 calc R . . 
C85 C 0.5946(3) 0.8277(2) 0.11558(18) 0.0397(7) Uani 1 1 d . C . 
C86 C 0.6484(3) 0.7527(2) 0.16065(16) 0.0333(6) Uani 1 1 d . . . 
H86 H 0.7192 0.7606 0.1719 0.040 Uiso 1 1 calc R . . 
C87 C 0.3246(3) 0.7263(3) 0.1216(2) 0.0464(8) Uani 1 1 d . . . 
C88 C 0.6539(4) 0.9169(3) 0.0849(2) 0.0599(11) Uani 1 1 d . . . 
B B 0.6565(2) 0.5798(2) 0.24967(17) 0.0250(6) Uani 1 1 d . . . 
 
loop_ 
 _atom_site_aniso_label 
 _atom_site_aniso_U_11 
 _atom_site_aniso_U_22 
 _atom_site_aniso_U_33 
 _atom_site_aniso_U_23 
 _atom_site_aniso_U_13 
 _atom_site_aniso_U_12 
Ir1 0.02593(6) 0.02384(5) 0.02626(6) -0.00295(4) 0.00209(4) -0.00213(4) 
Ir2 0.02569(5) 0.02046(5) 0.02475(6) -0.00402(4) -0.00009(4) -0.00032(4) 
P1 0.0254(3) 0.0262(3) 0.0310(4) -0.0037(3) -0.0013(3) -0.0008(3) 
P2 0.0261(3) 0.0230(3) 0.0296(4) -0.0014(3) 0.0020(3) -0.0006(3) 
P3 0.0348(4) 0.0237(3) 0.0296(4) -0.0042(3) 0.0030(3) -0.0050(3) 
P4 0.0332(4) 0.0237(3) 0.0256(3) -0.0039(3) -0.0015(3) 0.0008(3) 
O1 0.075(2) 0.078(2) 0.0442(15) -0.0130(14) 0.0190(14) 0.0181(16) 
O2 0.082(2) 0.0588(17) 0.0504(16) -0.0309(14) -0.0046(14) 0.0140(14) 
O3 0.0321(13) 0.0441(14) 0.082(2) -0.0009(13) 0.0047(12) 0.0001(10) 
C1 0.0394(17) 0.0416(17) 0.0362(17) -0.0031(13) 0.0072(14) 0.0049(13) 
C2 0.0500(19) 0.0306(15) 0.0358(17) -0.0104(13) -0.0065(14) 0.0043(13) 
C3 0.0347(16) 0.0262(14) 0.0439(18) 0.0002(12) -0.0020(13) 0.0007(12) 
C4 0.0335(14) 0.0255(13) 0.0279(14) -0.0048(11) 0.0009(11) -0.0030(11) 
C5 0.0440(18) 0.0382(16) 0.0356(17) -0.0128(13) 0.0031(13) -0.0019(13) 
C6 0.0311(14) 0.0297(14) 0.0288(14) -0.0003(11) -0.0015(11) 0.0010(11) 
C7 0.0378(15) 0.0214(13) 0.0310(15) -0.0035(11) 0.0008(12) 0.0002(11) 
C11 0.0271(14) 0.0337(16) 0.053(2) -0.0112(14) 0.0043(13) 0.0036(12) 
C12 0.0380(18) 0.0338(17) 0.074(3) -0.0085(17) -0.0022(17) 0.0066(14) 
C13 0.0420(18) 0.0443(18) 0.0442(19) -0.0014(15) -0.0150(15) -0.0046(14) 
C14 0.075(3) 0.063(3) 0.054(2) -0.015(2) -0.021(2) -0.017(2) 
C21 0.0292(15) 0.0421(17) 0.0372(17) 0.0014(13) 0.0063(12) 0.0008(12) 
C22 0.045(2) 0.058(2) 0.0390(19) 0.0110(16) 0.0063(15) -0.0021(16) 
C23 0.0367(16) 0.0235(14) 0.0504(19) -0.0053(13) -0.0025(14) -0.0004(12) 
C24 0.049(2) 0.0366(18) 0.083(3) -0.0197(18) -0.0078(19) -0.0076(15) 
C31 0.0463(18) 0.0350(16) 0.0346(16) -0.0015(13) 0.0084(14) -0.0036(13) 
C32 0.072(3) 0.046(2) 0.049(2) 0.0109(17) 0.020(2) 0.0024(19) 
C33 0.0460(18) 0.0301(15) 0.0471(19) -0.0134(14) 0.0024(15) -0.0095(13) 
C34 0.049(2) 0.050(2) 0.081(3) -0.028(2) -0.001(2) -0.0174(17) 
C41 0.0522(19) 0.0367(16) 0.0241(14) -0.0040(12) 0.0010(13) -0.0041(14) 
C42 0.078(3) 0.048(2) 0.0328(18) -0.0106(15) -0.0115(17) -0.0105(18) 
C43 0.0367(16) 0.0341(16) 0.0423(18) -0.0029(13) -0.0065(13) 0.0062(13) 
C44 0.0427(19) 0.0423(19) 0.056(2) -0.0108(16) 0.0028(16) 0.0105(15) 
F51 0.107(2) 0.129(3) 0.0536(15) -0.0441(16) -0.0417(15) 0.0427(19) 
F52 0.153(3) 0.0610(15) 0.0486(14) -0.0343(12) 0.0038(16) -0.0186(16) 
F53 0.0845(19) 0.214(4) 0.0440(14) -0.0627(19) 0.0331(13) -0.088(2) 
F54 0.141(3) 0.0389(12) 0.0408(12) 0.0007(9) -0.0252(14) -0.0013(13) 
F55 0.0684(15) 0.0598(14) 0.0680(16) 0.0078(12) 0.0173(12) -0.0215(12) 
F56 0.0859(17) 0.0333(11) 0.0630(14) 0.0040(10) 0.0153(12) 0.0195(11) 
F61 0.0566(15) 0.104(2) 0.0878(19) -0.0550(17) -0.0153(13) -0.0174(14) 
F62 0.090(2) 0.262(5) 0.138(3) -0.171(4) 0.055(2) -0.085(3) 
F63 0.181(4) 0.0472(16) 0.171(4) -0.037(2) -0.090(3) -0.0185(19) 
F64 0.0321(10) 0.0479(12) 0.112(2) 0.0130(13) -0.0068(12) 0.0059(9) 
F65 0.0395(11) 0.0412(11) 0.0813(16) -0.0062(10) 0.0026(10) -0.0100(9) 
F66 0.0645(16) 0.137(3) 0.0487(14) -0.0347(15) 0.0272(12) -0.0397(16) 
F71A 0.072(4) 0.144(9) 0.033(3) -0.015(4) -0.018(3) 0.037(5) 
F72A 0.137(9) 0.095(8) 0.053(4) -0.027(5) -0.039(5) 0.092(8) 
F73A 0.152(9) 0.071(5) 0.163(12) 0.023(5) -0.131(9) -0.044(6) 
F74A 0.074(6) 0.103(5) 0.026(4) -0.018(4) 0.004(3) 0.005(4) 
F75A 0.028(3) 0.35(2) 0.061(6) 0.002(10) 0.012(3) -0.016(7) 
F76A 0.31(2) 0.085(6) 0.079(8) 0.013(5) 0.080(13) -0.054(9) 
F71B 0.045(3) 0.184(12) 0.078(5) 0.006(6) -0.034(3) 0.004(5) 
F72B 0.173(13) 0.201(14) 0.084(7) -0.104(9) -0.096(8) 0.130(10) 
F73B 0.197(14) 0.061(6) 0.156(13) 0.045(6) -0.121(11) -0.017(7) 
F74B 0.088(5) 0.071(5) 0.102(9) 0.026(4) 0.048(5) -0.021(4) 
F75B 0.036(4) 0.30(2) 0.035(4) 0.043(8) 0.002(3) 0.020(8) 
F76B 0.046(4) 0.082(4) 0.054(4) -0.004(3) 0.031(3) 0.013(3) 
F81 0.0374(11) 0.116(2) 0.0548(14) -0.0421(14) 0.0000(10) 0.0139(12) 
F82 0.0474(12) 0.0758(16) 0.0802(17) -0.0400(14) -0.0259(12) 0.0100(11) 
F83 0.0581(14) 0.0870(18) 0.0589(14) -0.0188(13) -0.0295(11) 0.0326(13) 
F84A 0.200(14) 0.058(6) 0.072(7) -0.027(6) 0.039(8) -0.050(7) 
F85A 0.083(6) 0.074(7) 0.117(8) 0.067(6) -0.016(6) -0.003(5) 
F86A 0.059(3) 0.053(4) 0.125(10) 0.015(4) 0.031(4) -0.007(3) 
F84B 0.098(6) 0.044(5) 0.108(8) 0.022(4) -0.047(6) -0.034(4) 
F85B 0.124(10) 0.026(3) 0.180(13) 0.016(6) -0.049(8) 0.001(4) 
F86B 0.27(2) 0.084(9) 0.071(6) -0.024(6) 0.085(10) -0.083(11) 
C51 0.0226(12) 0.0268(13) 0.0261(13) -0.0064(10) 0.0011(10) -0.0019(10) 
C52 0.0267(13) 0.0300(14) 0.0253(13) -0.0061(11) -0.0001(10) -0.0020(10) 
C53 0.0250(13) 0.0360(15) 0.0296(14) -0.0127(12) 0.0007(11) -0.0044(11) 
C54 0.0317(14) 0.0288(14) 0.0378(16) -0.0124(12) 0.0037(12) -0.0032(11) 
C55 0.0295(14) 0.0273(13) 0.0314(15) -0.0051(11) 0.0037(11) -0.0029(11) 
C56 0.0310(14) 0.0287(14) 0.0248(13) -0.0064(11) 0.0000(11) -0.0019(11) 
C57 0.0399(17) 0.0458(18) 0.0335(16) -0.0161(14) -0.0028(13) -0.0052(14) 
C58 0.054(2) 0.0291(15) 0.0375(17) -0.0049(13) 0.0065(15) -0.0026(14) 
C61 0.0283(13) 0.0219(12) 0.0252(13) -0.0043(10) -0.0024(10) 0.0010(10) 
C62 0.0295(14) 0.0282(14) 0.0321(15) -0.0091(11) 0.0001(11) -0.0031(11) 
C63 0.0356(15) 0.0329(15) 0.0372(16) -0.0168(12) -0.0034(12) 0.0007(12) 
C64 0.0374(16) 0.0331(15) 0.0290(15) -0.0097(12) 0.0001(12) 0.0038(12) 
C65 0.0287(14) 0.0289(14) 0.0266(14) -0.0009(11) -0.0008(11) 0.0021(11) 
C66 0.0308(14) 0.0255(13) 0.0246(13) -0.0049(10) -0.0032(11) -0.0008(10) 
C67 0.051(2) 0.057(2) 0.062(2) -0.037(2) -0.0003(18) -0.0065(17) 
C68 0.0332(15) 0.0401(17) 0.0359(16) -0.0049(13) 0.0030(12) 0.0006(13) 
C71 0.0282(13) 0.0193(12) 0.0273(13) -0.0054(10) -0.0021(10) -0.0010(10) 
C72 0.0343(14) 0.0269(13) 0.0253(14) -0.0045(11) -0.0040(11) 0.0006(11) 
C73 0.0329(15) 0.0291(14) 0.0358(16) -0.0075(12) -0.0089(12) 0.0016(11) 
C74 0.0265(14) 0.0396(16) 0.0444(18) -0.0094(14) -0.0031(12) -0.0019(12) 
C75 0.0274(14) 0.0404(16) 0.0331(16) -0.0038(12) 0.0017(12) -0.0040(12) 
C76 0.0283(13) 0.0297(14) 0.0277(14) -0.0028(11) -0.0033(11) -0.0025(11) 
C77 0.045(2) 0.054(2) 0.048(2) -0.0036(17) -0.0154(16) 0.0058(16) 
C78 0.040(2) 0.088(3) 0.047(2) 0.004(2) 0.0094(17) -0.007(2) 
C81 0.0313(14) 0.0278(13) 0.0230(13) -0.0070(10) -0.0003(10) 0.0026(11) 
C82 0.0328(14) 0.0338(15) 0.0257(14) -0.0096(11) -0.0007(11) 0.0044(11) 
C83 0.0344(15) 0.0450(17) 0.0289(15) -0.0150(13) -0.0069(12) 0.0144(13) 
C84 0.053(2) 0.0394(17) 0.0289(15) -0.0073(13) -0.0086(14) 0.0191(15) 
C85 0.053(2) 0.0299(15) 0.0315(16) -0.0025(12) -0.0005(14) 0.0068(13) 
C86 0.0378(16) 0.0309(14) 0.0288(15) -0.0031(11) -0.0018(12) 0.0011(12) 
C87 0.0392(17) 0.066(2) 0.0405(18) -0.0262(17) -0.0122(14) 0.0180(16) 
C88 0.084(3) 0.0359(19) 0.052(2) 0.0079(17) -0.008(2) -0.0024(19) 
B 0.0280(15) 0.0227(14) 0.0231(14) -0.0034(11) -0.0007(11) -0.0017(11) 
 
_geom_special_details 
; 
 All esds (except the esd in the dihedral angle between two l.s. planes) 
 are estimated using the full covariance matrix.  The cell esds are taken 
 into account individually in the estimation of esds in distances, angles 
 and torsion angles; correlations between esds in cell parameters are only 
 used when they are defined by crystal symmetry.  An approximate (isotropic) 
 treatment of cell esds is used for estimating esds involving l.s. planes. 
; 
 
loop_ 
 _geom_bond_atom_site_label_1 
 _geom_bond_atom_site_label_2 
 _geom_bond_distance 
 _geom_bond_site_symmetry_2 
 _geom_bond_publ_flag 
Ir1 C1 1.900(3) . ? 
Ir1 C4 2.031(3) . ? 
Ir1 P3 2.3013(8) . ? 
Ir1 P1 2.3017(7) . ? 
Ir1 Ir2 2.7960(4) . ? 
Ir1 H1 1.542(7) . ?
Ir2 C3 1.895(3) . ? 
Ir2 C2 1.938(3) . ? 
Ir2 C4 2.126(3) . ? 
Ir2 P2 2.3463(7) . ? 
Ir2 P4 2.3470(7) . ? 
P1 C6 1.823(3) . ? 
P1 C11 1.824(3) . ? 
P1 C13 1.832(3) . ? 
P2 C6 1.813(3) . ? 
P2 C23 1.826(3) . ? 
P2 C21 1.829(3) . ? 
P3 C7 1.820(3) . ? 
P3 C31 1.828(3) . ? 
P3 C33 1.828(3) . ? 
P4 C7 1.813(3) . ? 
P4 C43 1.827(3) . ? 
P4 C41 1.834(3) . ? 
O1 C1 1.145(4) . ? 
O2 C2 1.136(4) . ? 
O3 C3 1.146(4) . ? 
C4 C5 1.330(4) . ? 
C11 C12 1.522(5) . ? 
C13 C14 1.520(5) . ? 
C21 C22 1.526(4) . ? 
C23 C24 1.526(5) . ? 
C31 C32 1.518(5) . ? 
C33 C34 1.519(5) . ? 
C41 C42 1.525(5) . ? 
C43 C44 1.520(5) . ? 
F51 C57 1.311(4) . ? 
F52 C57 1.322(4) . ? 
F53 C57 1.291(4) . ? 
F54 C58 1.318(4) . ? 
F55 C58 1.344(4) . ? 
F56 C58 1.329(4) . ? 
F61 C67 1.311(5) . ? 
F62 C67 1.290(5) . ? 
F63 C67 1.322(5) . ? 
F64 C68 1.329(4) . ? 
F65 C68 1.325(4) . ? 
F66 C68 1.335(4) . ? 
F71A C77 1.317(6) . ? 
F72A C77 1.281(5) . ? 
F73A C77 1.301(5) . ? 
F74A C78 1.324(6) . ? 
F75A C78 1.290(6) . ? 
F76A C78 1.314(6) . ? 
F71B C77 1.314(6) . ? 
F72B C77 1.267(6) . ? 
F73B C77 1.284(6) . ? 
F74B C78 1.325(6) . ? 
F75B C78 1.298(6) . ? 
F76B C78 1.332(5) . ? 
F81 C87 1.343(4) . ? 
F82 C87 1.331(4) . ? 
F83 C87 1.336(4) . ? 
F84A C88 1.284(14) . ? 
F85A C88 1.299(12) . ? 
F86A C88 1.375(12) . ? 
F84B C88 1.315(13) . ? 
F85B C88 1.377(13) . ? 
F86B C88 1.227(13) . ? 
C51 C52 1.394(4) . ? 
C51 C56 1.405(4) . ? 
C51 B 1.641(4) . ? 
C52 C53 1.392(4) . ? 
C53 C54 1.382(4) . ? 
C53 C57 1.493(4) . ? 
C54 C55 1.387(4) . ? 
C55 C56 1.395(4) . ? 
C55 C58 1.492(4) . ? 
C61 C62 1.397(4) . ? 
C61 C66 1.400(4) . ? 
C61 B 1.633(4) . ? 
C62 C63 1.389(4) . ? 
C63 C64 1.378(4) . ? 
C63 C67 1.501(4) . ? 
C64 C65 1.383(4) . ? 
C65 C66 1.391(4) . ? 
C65 C68 1.500(4) . ? 
C71 C72 1.396(4) . ? 
C71 C76 1.402(4) . ? 
C71 B 1.635(4) . ? 
C72 C73 1.393(4) . ? 
C73 C74 1.379(4) . ? 
C73 C77 1.498(4) . ? 
C74 C75 1.385(4) . ? 
C75 C76 1.392(4) . ? 
C75 C78 1.498(5) . ? 
C81 C82 1.395(4) . ? 
C81 C86 1.401(4) . ? 
C81 B 1.643(4) . ? 
C82 C83 1.397(4) . ? 
C83 C84 1.380(5) . ? 
C83 C87 1.498(5) . ? 
C84 C85 1.379(5) . ? 
C85 C86 1.395(4) . ? 
C85 C88 1.507(5) . ? 
 
loop_ 
 _geom_angle_atom_site_label_1 
 _geom_angle_atom_site_label_2 
 _geom_angle_atom_site_label_3 
 _geom_angle 
 _geom_angle_site_symmetry_1 
 _geom_angle_site_symmetry_3 
 _geom_angle_publ_flag 
C1 Ir1 C4 157.96(14) . . ? 
C1 Ir1 P3 95.07(10) . . ? 
C4 Ir1 P3 86.48(8) . . ? 
C1 Ir1 P1 94.28(10) . . ? 
C4 Ir1 P1 90.33(8) . . ? 
P3 Ir1 P1 162.61(3) . . ? 
C1 Ir1 Ir2 108.92(11) . . ? 
C4 Ir1 Ir2 49.18(8) . . ? 
P3 Ir1 Ir2 96.80(2) . . ? 
P1 Ir1 Ir2 93.987(19) . . ? 
C1 Ir1 H1 102.3(17) . . ?
C4 Ir1 H1 99.8(17) . . ?
P3 Ir1 H1 84.0(17) . . ?
P1 Ir1 H1 79.7(17) . . ?
Ir2 Ir1 H1 148.6(17) . . ?
C3 Ir2 C2 116.14(14) . . ? 
C3 Ir2 C4 107.82(13) . . ? 
C2 Ir2 C4 135.98(13) . . ? 
C3 Ir2 P2 88.92(9) . . ? 
C2 Ir2 P2 92.98(10) . . ? 
C4 Ir2 P2 85.39(8) . . ? 
C3 Ir2 P4 89.50(9) . . ? 
C2 Ir2 P4 92.45(10) . . ? 
C4 Ir2 P4 90.07(8) . . ? 
P2 Ir2 P4 174.49(3) . . ? 
C3 Ir2 Ir1 153.89(10) . . ? 
C2 Ir2 Ir1 89.90(10) . . ? 
C4 Ir2 Ir1 46.31(8) . . ? 
P2 Ir2 Ir1 91.726(18) . . ? 
P4 Ir2 Ir1 87.377(19) . . ? 
C6 P1 C11 106.03(14) . . ? 
C6 P1 C13 103.16(15) . . ? 
C11 P1 C13 103.16(16) . . ? 
C6 P1 Ir1 112.31(9) . . ? 
C11 P1 Ir1 114.59(11) . . ? 
C13 P1 Ir1 116.33(11) . . ? 
C6 P2 C23 104.63(14) . . ? 
C6 P2 C21 102.38(15) . . ? 
C23 P2 C21 104.82(15) . . ? 
C6 P2 Ir2 114.51(9) . . ? 
C23 P2 Ir2 115.82(11) . . ? 
C21 P2 Ir2 113.28(10) . . ? 
C7 P3 C31 106.72(15) . . ? 
C7 P3 C33 101.51(14) . . ? 
C31 P3 C33 104.93(16) . . ? 
C7 P3 Ir1 111.74(9) . . ? 
C31 P3 Ir1 115.56(11) . . ? 
C33 P3 Ir1 115.09(12) . . ? 
C7 P4 C43 102.54(14) . . ? 
C7 P4 C41 104.54(14) . . ? 
C43 P4 C41 102.80(16) . . ? 
C7 P4 Ir2 113.70(10) . . ? 
C43 P4 Ir2 116.28(11) . . ? 
C41 P4 Ir2 115.34(11) . . ? 
O1 C1 Ir1 175.7(3) . . ? 
O2 C2 Ir2 176.5(3) . . ? 
O3 C3 Ir2 178.7(3) . . ? 
C5 C4 Ir1 143.6(2) . . ? 
C5 C4 Ir2 131.9(2) . . ? 
Ir1 C4 Ir2 84.52(10) . . ? 
P2 C6 P1 113.11(15) . . ? 
P4 C7 P3 111.86(14) . . ? 
C12 C11 P1 116.9(3) . . ? 
C14 C13 P1 115.1(3) . . ? 
C22 C21 P2 115.8(2) . . ? 
C24 C23 P2 114.4(2) . . ? 
C32 C31 P3 117.1(2) . . ? 
C34 C33 P3 114.3(2) . . ? 
C42 C41 P4 113.6(2) . . ? 
C44 C43 P4 114.6(2) . . ? 
C52 C51 C56 116.2(2) . . ? 
C52 C51 B 121.0(2) . . ? 
C56 C51 B 122.1(2) . . ? 
C53 C52 C51 122.1(3) . . ? 
C54 C53 C52 120.9(3) . . ? 
C54 C53 C57 120.3(3) . . ? 
C52 C53 C57 118.7(3) . . ? 
C53 C54 C55 118.3(3) . . ? 
C54 C55 C56 120.8(3) . . ? 
C54 C55 C58 118.3(3) . . ? 
C56 C55 C58 121.0(3) . . ? 
C55 C56 C51 121.7(3) . . ? 
F53 C57 F51 106.4(3) . . ? 
F53 C57 F52 108.4(3) . . ? 
F51 C57 F52 102.9(3) . . ? 
F53 C57 C53 112.5(3) . . ? 
F51 C57 C53 112.3(3) . . ? 
F52 C57 C53 113.5(3) . . ? 
F54 C58 F56 107.6(3) . . ? 
F54 C58 F55 105.1(3) . . ? 
F56 C58 F55 104.5(3) . . ? 
F54 C58 C55 114.0(3) . . ? 
F56 C58 C55 112.8(3) . . ? 
F55 C58 C55 112.0(3) . . ? 
C62 C61 C66 115.9(2) . . ? 
C62 C61 B 121.8(2) . . ? 
C66 C61 B 121.7(2) . . ? 
C63 C62 C61 122.1(3) . . ? 
C64 C63 C62 121.1(3) . . ? 
C64 C63 C67 120.7(3) . . ? 
C62 C63 C67 118.2(3) . . ? 
C63 C64 C65 118.0(3) . . ? 
C64 C65 C66 120.9(3) . . ? 
C64 C65 C68 119.8(3) . . ? 
C66 C65 C68 119.2(3) . . ? 
C65 C66 C61 122.0(3) . . ? 
F62 C67 F61 105.7(4) . . ? 
F62 C67 F63 109.2(4) . . ? 
F61 C67 F63 102.5(4) . . ? 
F62 C67 C63 113.7(3) . . ? 
F61 C67 C63 113.3(3) . . ? 
F63 C67 C63 111.8(3) . . ? 
F65 C68 F64 105.0(3) . . ? 
F65 C68 F66 105.4(3) . . ? 
F64 C68 F66 108.0(3) . . ? 
F65 C68 C65 113.8(3) . . ? 
F64 C68 C65 111.4(3) . . ? 
F66 C68 C65 112.7(3) . . ? 
C72 C71 C76 115.9(2) . . ? 
C72 C71 B 122.5(2) . . ? 
C76 C71 B 121.2(2) . . ? 
C73 C72 C71 121.9(3) . . ? 
C74 C73 C72 121.2(3) . . ? 
C74 C73 C77 118.9(3) . . ? 
C72 C73 C77 119.9(3) . . ? 
C73 C74 C75 118.1(3) . . ? 
C74 C75 C76 120.7(3) . . ? 
C74 C75 C78 119.4(3) . . ? 
C76 C75 C78 119.9(3) . . ? 
C75 C76 C71 122.1(3) . . ? 
F72B C77 F73B 111.3(10) . . ? 
F72A C77 F73A 108.8(8) . . ? 
F72B C77 F71B 109.3(8) . . ? 
F73B C77 F71B 100.0(8) . . ? 
F72A C77 F71A 100.4(7) . . ? 
F73A C77 F71A 103.8(8) . . ? 
F72B C77 C73 114.0(5) . . ? 
F72A C77 C73 115.1(5) . . ? 
F73B C77 C73 109.2(6) . . ? 
F73A C77 C73 113.5(4) . . ? 
F71B C77 C73 112.2(4) . . ? 
F71A C77 C73 114.0(5) . . ? 
F75A C78 F76A 110.8(10) . . ? 
F75A C78 F74A 104.3(10) . . ? 
F76A C78 F74A 98.4(10) . . ? 
F75B C78 F74B 110.0(10) . . ? 
F75B C78 F76B 109.0(9) . . ? 
F74B C78 F76B 102.1(7) . . ? 
F75A C78 C75 118.2(7) . . ? 
F75B C78 C75 115.0(6) . . ? 
F76A C78 C75 112.2(7) . . ? 
F74A C78 C75 110.9(6) . . ? 
F74B C78 C75 110.3(6) . . ? 
F76B C78 C75 109.6(5) . . ? 
C82 C81 C86 116.1(3) . . ? 
C82 C81 B 120.1(2) . . ? 
C86 C81 B 123.2(3) . . ? 
C81 C82 C83 121.8(3) . . ? 
C84 C83 C82 121.0(3) . . ? 
C84 C83 C87 121.1(3) . . ? 
C82 C83 C87 117.7(3) . . ? 
C85 C84 C83 118.2(3) . . ? 
C84 C85 C86 121.0(3) . . ? 
C84 C85 C88 121.2(3) . . ? 
C86 C85 C88 117.8(3) . . ? 
C85 C86 C81 121.8(3) . . ? 
F82 C87 F83 106.9(3) . . ? 
F82 C87 F81 106.1(3) . . ? 
F83 C87 F81 106.3(3) . . ? 
F82 C87 C83 112.5(3) . . ? 
F83 C87 C83 113.0(3) . . ? 
F81 C87 C83 111.6(3) . . ? 
F84A C88 F85A 111.1(10) . . ? 
F86B C88 F84B 109.3(12) . . ? 
F84A C88 F86A 103.1(11) . . ? 
F85A C88 F86A 99.8(8) . . ? 
F86B C88 F85B 111.6(10) . . ? 
F84B C88 F85B 100.1(9) . . ? 
F86B C88 C85 115.1(8) . . ? 
F84A C88 C85 115.8(7) . . ? 
F85A C88 C85 114.3(7) . . ? 
F84B C88 C85 111.5(7) . . ? 
F86A C88 C85 110.8(7) . . ? 
F85B C88 C85 108.3(6) . . ? 
C61 B C71 113.6(2) . . ? 
C61 B C51 113.4(2) . . ? 
C71 B C51 102.5(2) . . ? 
C61 B C81 102.6(2) . . ? 
C71 B C81 113.5(2) . . ? 
C51 B C81 111.8(2) . . ? 
 
loop_ 
 _geom_torsion_atom_site_label_1 
 _geom_torsion_atom_site_label_2 
 _geom_torsion_atom_site_label_3 
 _geom_torsion_atom_site_label_4 
 _geom_torsion 
 _geom_torsion_site_symmetry_1 
 _geom_torsion_site_symmetry_2 
 _geom_torsion_site_symmetry_3 
 _geom_torsion_site_symmetry_4 
 _geom_torsion_publ_flag 
C1 Ir1 Ir2 C3 168.0(2) . . . . ? 
C4 Ir1 Ir2 C3 -9.1(2) . . . . ? 
P3 Ir1 Ir2 C3 70.2(2) . . . . ? 
P1 Ir1 Ir2 C3 -96.1(2) . . . . ? 
C1 Ir1 Ir2 C2 -7.96(14) . . . . ? 
C4 Ir1 Ir2 C2 174.93(14) . . . . ? 
P3 Ir1 Ir2 C2 -105.71(10) . . . . ? 
P1 Ir1 Ir2 C2 87.95(10) . . . . ? 
C1 Ir1 Ir2 C4 177.11(15) . . . . ? 
P3 Ir1 Ir2 C4 79.36(11) . . . . ? 
P1 Ir1 Ir2 C4 -86.98(11) . . . . ? 
C1 Ir1 Ir2 P2 -100.93(11) . . . . ? 
C4 Ir1 Ir2 P2 81.95(10) . . . . ? 
P3 Ir1 Ir2 P2 161.31(3) . . . . ? 
P1 Ir1 Ir2 P2 -5.03(3) . . . . ? 
C1 Ir1 Ir2 P4 84.51(11) . . . . ? 
C4 Ir1 Ir2 P4 -92.61(10) . . . . ? 
P3 Ir1 Ir2 P4 -13.25(3) . . . . ? 
P1 Ir1 Ir2 P4 -179.59(2) . . . . ? 
C1 Ir1 P1 C6 135.17(16) . . . . ? 
C4 Ir1 P1 C6 -23.25(14) . . . . ? 
P3 Ir1 P1 C6 -102.47(13) . . . . ? 
Ir2 Ir1 P1 C6 25.83(11) . . . . ? 
C1 Ir1 P1 C11 14.10(16) . . . . ? 
C4 Ir1 P1 C11 -144.32(14) . . . . ? 
P3 Ir1 P1 C11 136.47(13) . . . . ? 
Ir2 Ir1 P1 C11 -95.23(12) . . . . ? 
C1 Ir1 P1 C13 -106.29(17) . . . . ? 
C4 Ir1 P1 C13 95.29(16) . . . . ? 
P3 Ir1 P1 C13 16.07(17) . . . . ? 
Ir2 Ir1 P1 C13 144.37(14) . . . . ? 
C3 Ir2 P2 C6 137.65(15) . . . . ? 
C2 Ir2 P2 C6 -106.22(15) . . . . ? 
C4 Ir2 P2 C6 29.68(13) . . . . ? 
P4 Ir2 P2 C6 64.3(3) . . . . ? 
Ir1 Ir2 P2 C6 -16.23(11) . . . . ? 
C3 Ir2 P2 C23 -100.41(15) . . . . ? 
C2 Ir2 P2 C23 15.71(15) . . . . ? 
C4 Ir2 P2 C23 151.61(14) . . . . ? 
P4 Ir2 P2 C23 -173.8(3) . . . . ? 
Ir1 Ir2 P2 C23 105.70(11) . . . . ? 
C3 Ir2 P2 C21 20.75(16) . . . . ? 
C2 Ir2 P2 C21 136.87(16) . . . . ? 
C4 Ir2 P2 C21 -87.23(15) . . . . ? 
P4 Ir2 P2 C21 -52.6(3) . . . . ? 
Ir1 Ir2 P2 C21 -133.14(13) . . . . ? 
C1 Ir1 P3 C7 -118.34(15) . . . . ? 
C4 Ir1 P3 C7 39.61(13) . . . . ? 
P1 Ir1 P3 C7 119.40(13) . . . . ? 
Ir2 Ir1 P3 C7 -8.56(11) . . . . ? 
C1 Ir1 P3 C31 3.95(17) . . . . ? 
C4 Ir1 P3 C31 161.89(16) . . . . ? 
P1 Ir1 P3 C31 -118.32(15) . . . . ? 
Ir2 Ir1 P3 C31 113.73(13) . . . . ? 
C1 Ir1 P3 C33 126.59(16) . . . . ? 
C4 Ir1 P3 C33 -75.47(15) . . . . ? 
P1 Ir1 P3 C33 4.32(16) . . . . ? 
Ir2 Ir1 P3 C33 -123.63(12) . . . . ? 
C3 Ir2 P4 C7 -118.43(15) . . . . ? 
C2 Ir2 P4 C7 125.43(15) . . . . ? 
C4 Ir2 P4 C7 -10.61(13) . . . . ? 
P2 Ir2 P4 C7 -45.1(3) . . . . ? 
Ir1 Ir2 P4 C7 35.64(10) . . . . ? 
C3 Ir2 P4 C43 0.34(16) . . . . ? 
C2 Ir2 P4 C43 -115.81(16) . . . . ? 
C4 Ir2 P4 C43 108.16(14) . . . . ? 
P2 Ir2 P4 C43 73.7(3) . . . . ? 
Ir1 Ir2 P4 C43 154.41(12) . . . . ? 
C3 Ir2 P4 C41 120.82(16) . . . . ? 
C2 Ir2 P4 C41 4.67(16) . . . . ? 
C4 Ir2 P4 C41 -131.36(15) . . . . ? 
P2 Ir2 P4 C41 -165.9(3) . . . . ? 
Ir1 Ir2 P4 C41 -85.11(12) . . . . ? 
C4 Ir1 C1 O1 -6(4) . . . . ? 
P3 Ir1 C1 O1 87(4) . . . . ? 
P1 Ir1 C1 O1 -107(4) . . . . ? 
Ir2 Ir1 C1 O1 -12(4) . . . . ? 
C3 Ir2 C2 O2 162(5) . . . . ? 
C4 Ir2 C2 O2 -15(5) . . . . ? 
P2 Ir2 C2 O2 72(5) . . . . ? 
P4 Ir2 C2 O2 -107(5) . . . . ? 
Ir1 Ir2 C2 O2 -20(5) . . . . ? 
C2 Ir2 C3 O3 34(12) . . . . ? 
C4 Ir2 C3 O3 -149(12) . . . . ? 
P2 Ir2 C3 O3 126(12) . . . . ? 
P4 Ir2 C3 O3 -59(12) . . . . ? 
Ir1 Ir2 C3 O3 -142(12) . . . . ? 
C1 Ir1 C4 C5 172.5(4) . . . . ? 
P3 Ir1 C4 C5 77.6(4) . . . . ? 
P1 Ir1 C4 C5 -85.3(4) . . . . ? 
Ir2 Ir1 C4 C5 179.7(4) . . . . ? 
C1 Ir1 C4 Ir2 -7.3(4) . . . . ? 
P3 Ir1 C4 Ir2 -102.12(7) . . . . ? 
P1 Ir1 C4 Ir2 94.99(7) . . . . ? 
C3 Ir2 C4 C5 -4.0(3) . . . . ? 
C2 Ir2 C4 C5 172.9(3) . . . . ? 
P2 Ir2 C4 C5 83.4(3) . . . . ? 
P4 Ir2 C4 C5 -93.5(3) . . . . ? 
Ir1 Ir2 C4 C5 -179.8(4) . . . . ? 
C3 Ir2 C4 Ir1 175.80(10) . . . . ? 
C2 Ir2 C4 Ir1 -7.3(2) . . . . ? 
P2 Ir2 C4 Ir1 -96.82(7) . . . . ? 
P4 Ir2 C4 Ir1 86.30(7) . . . . ? 
C23 P2 C6 P1 -89.60(18) . . . . ? 
C21 P2 C6 P1 161.26(17) . . . . ? 
Ir2 P2 C6 P1 38.26(18) . . . . ? 
C11 P1 C6 P2 83.12(19) . . . . ? 
C13 P1 C6 P2 -168.79(16) . . . . ? 
Ir1 P1 C6 P2 -42.75(18) . . . . ? 
C43 P4 C7 P3 -176.76(16) . . . . ? 
C41 P4 C7 P3 76.25(19) . . . . ? 
Ir2 P4 C7 P3 -50.39(17) . . . . ? 
C31 P3 C7 P4 -92.07(18) . . . . ? 
C33 P3 C7 P4 158.32(17) . . . . ? 
Ir1 P3 C7 P4 35.15(18) . . . . ? 
C6 P1 C11 C12 47.5(3) . . . . ? 
C13 P1 C11 C12 -60.6(3) . . . . ? 
Ir1 P1 C11 C12 172.0(2) . . . . ? 
C6 P1 C13 C14 66.8(3) . . . . ? 
C11 P1 C13 C14 177.0(3) . . . . ? 
Ir1 P1 C13 C14 -56.7(3) . . . . ? 
C6 P2 C21 C22 51.3(3) . . . . ? 
C23 P2 C21 C22 -57.6(3) . . . . ? 
Ir2 P2 C21 C22 175.2(2) . . . . ? 
C6 P2 C23 C24 -168.7(3) . . . . ? 
C21 P2 C23 C24 -61.3(3) . . . . ? 
Ir2 P2 C23 C24 64.3(3) . . . . ? 
C7 P3 C31 C32 -52.6(3) . . . . ? 
C33 P3 C31 C32 54.6(3) . . . . ? 
Ir1 P3 C31 C32 -177.6(3) . . . . ? 
C7 P3 C33 C34 171.5(3) . . . . ? 
C31 P3 C33 C34 60.5(3) . . . . ? 
Ir1 P3 C33 C34 -67.7(3) . . . . ? 
C7 P4 C41 C42 158.1(2) . . . . ? 
C43 P4 C41 C42 51.3(3) . . . . ? 
Ir2 P4 C41 C42 -76.3(3) . . . . ? 
C7 P4 C43 C44 52.7(3) . . . . ? 
C41 P4 C43 C44 161.1(2) . . . . ? 
Ir2 P4 C43 C44 -71.9(3) . . . . ? 
C56 C51 C52 C53 -1.5(4) . . . . ? 
B C51 C52 C53 168.9(2) . . . . ? 
C51 C52 C53 C54 1.1(4) . . . . ? 
C51 C52 C53 C57 -175.9(3) . . . . ? 
C52 C53 C54 C55 0.0(4) . . . . ? 
C57 C53 C54 C55 177.0(3) . . . . ? 
C53 C54 C55 C56 -0.7(4) . . . . ? 
C53 C54 C55 C58 179.8(3) . . . . ? 
C54 C55 C56 C51 0.2(4) . . . . ? 
C58 C55 C56 C51 179.8(3) . . . . ? 
C52 C51 C56 C55 0.8(4) . . . . ? 
B C51 C56 C55 -169.5(3) . . . . ? 
C54 C53 C57 F53 -115.7(4) . . . . ? 
C52 C53 C57 F53 61.3(4) . . . . ? 
C54 C53 C57 F51 124.2(3) . . . . ? 
C52 C53 C57 F51 -58.8(4) . . . . ? 
C54 C53 C57 F52 7.9(4) . . . . ? 
C52 C53 C57 F52 -175.1(3) . . . . ? 
C54 C55 C58 F54 166.7(3) . . . . ? 
C56 C55 C58 F54 -12.8(4) . . . . ? 
C54 C55 C58 F56 43.6(4) . . . . ? 
C56 C55 C58 F56 -136.0(3) . . . . ? 
C54 C55 C58 F55 -74.1(4) . . . . ? 
C56 C55 C58 F55 106.4(3) . . . . ? 
C66 C61 C62 C63 1.1(4) . . . . ? 
B C61 C62 C63 172.0(3) . . . . ? 
C61 C62 C63 C64 -1.5(5) . . . . ? 
C61 C62 C63 C67 179.6(3) . . . . ? 
C62 C63 C64 C65 0.3(5) . . . . ? 
C67 C63 C64 C65 179.1(3) . . . . ? 
C63 C64 C65 C66 1.3(4) . . . . ? 
C63 C64 C65 C68 -175.4(3) . . . . ? 
C64 C65 C66 C61 -1.8(4) . . . . ? 
C68 C65 C66 C61 174.9(3) . . . . ? 
C62 C61 C66 C65 0.6(4) . . . . ? 
B C61 C66 C65 -170.4(2) . . . . ? 
C64 C63 C67 F62 13.2(6) . . . . ? 
C62 C63 C67 F62 -167.9(4) . . . . ? 
C64 C63 C67 F61 133.9(4) . . . . ? 
C62 C63 C67 F61 -47.3(5) . . . . ? 
C64 C63 C67 F63 -110.9(4) . . . . ? 
C62 C63 C67 F63 67.9(4) . . . . ? 
C64 C65 C68 F65 -147.0(3) . . . . ? 
C66 C65 C68 F65 36.2(4) . . . . ? 
C64 C65 C68 F64 94.6(4) . . . . ? 
C66 C65 C68 F64 -82.2(4) . . . . ? 
C64 C65 C68 F66 -27.0(4) . . . . ? 
C66 C65 C68 F66 156.2(3) . . . . ? 
C76 C71 C72 C73 1.5(4) . . . . ? 
B C71 C72 C73 174.2(3) . . . . ? 
C71 C72 C73 C74 0.0(4) . . . . ? 
C71 C72 C73 C77 -178.7(3) . . . . ? 
C72 C73 C74 C75 -1.6(5) . . . . ? 
C77 C73 C74 C75 177.1(3) . . . . ? 
C73 C74 C75 C76 1.7(5) . . . . ? 
C73 C74 C75 C78 -177.2(3) . . . . ? 
C74 C75 C76 C71 -0.1(5) . . . . ? 
C78 C75 C76 C71 178.7(3) . . . . ? 
C72 C71 C76 C75 -1.5(4) . . . . ? 
B C71 C76 C75 -174.2(3) . . . . ? 
C74 C73 C77 F72B 134.3(11) . . . . ? 
C72 C73 C77 F72B -47.0(11) . . . . ? 
C74 C73 C77 F72A -65.9(8) . . . . ? 
C72 C73 C77 F72A 112.8(8) . . . . ? 
C74 C73 C77 F73B -100.6(10) . . . . ? 
C72 C73 C77 F73B 78.1(10) . . . . ? 
C74 C73 C77 F73A 60.3(10) . . . . ? 
C72 C73 C77 F73A -121.0(10) . . . . ? 
C74 C73 C77 F71B 9.3(9) . . . . ? 
C72 C73 C77 F71B -172.0(8) . . . . ? 
C74 C73 C77 F71A 178.9(6) . . . . ? 
C72 C73 C77 F71A -2.4(7) . . . . ? 
C74 C75 C78 F75A 18.5(11) . . . . ? 
C76 C75 C78 F75A -160.4(10) . . . . ? 
C74 C75 C78 F75B 162.1(10) . . . . ? 
C76 C75 C78 F75B -16.8(10) . . . . ? 
C74 C75 C78 F76A -112.3(10) . . . . ? 
C76 C75 C78 F76A 68.8(11) . . . . ? 
C74 C75 C78 F74A 138.8(6) . . . . ? 
C76 C75 C78 F74A -40.1(7) . . . . ? 
C74 C75 C78 F74B -72.8(6) . . . . ? 
C76 C75 C78 F74B 108.3(6) . . . . ? 
C74 C75 C78 F76B 38.9(7) . . . . ? 
C76 C75 C78 F76B -140.0(6) . . . . ? 
C86 C81 C82 C83 0.1(4) . . . . ? 
B C81 C82 C83 171.9(2) . . . . ? 
C81 C82 C83 C84 1.7(4) . . . . ? 
C81 C82 C83 C87 -174.3(3) . . . . ? 
C82 C83 C84 C85 -1.3(4) . . . . ? 
C87 C83 C84 C85 174.5(3) . . . . ? 
C83 C84 C85 C86 -0.8(5) . . . . ? 
C83 C84 C85 C88 179.8(3) . . . . ? 
C84 C85 C86 C81 2.6(5) . . . . ? 
C88 C85 C86 C81 -178.0(3) . . . . ? 
C82 C81 C86 C85 -2.2(4) . . . . ? 
B C81 C86 C85 -173.7(3) . . . . ? 
C84 C83 C87 F82 141.5(3) . . . . ? 
C82 C83 C87 F82 -42.6(4) . . . . ? 
C84 C83 C87 F83 20.3(4) . . . . ? 
C82 C83 C87 F83 -163.8(3) . . . . ? 
C84 C83 C87 F81 -99.4(4) . . . . ? 
C82 C83 C87 F81 76.5(4) . . . . ? 
C84 C85 C88 F86B -101.7(11) . . . . ? 
C86 C85 C88 F86B 78.8(11) . . . . ? 
C84 C85 C88 F84A 117.5(10) . . . . ? 
C86 C85 C88 F84A -61.9(10) . . . . ? 
C84 C85 C88 F85A -13.7(8) . . . . ? 
C86 C85 C88 F85A 166.9(7) . . . . ? 
C84 C85 C88 F84B 133.1(8) . . . . ? 
C86 C85 C88 F84B -46.4(9) . . . . ? 
C84 C85 C88 F86A -125.5(8) . . . . ? 
C86 C85 C88 F86A 55.0(8) . . . . ? 
C84 C85 C88 F85B 23.9(8) . . . . ? 
C86 C85 C88 F85B -155.6(7) . . . . ? 
C62 C61 B C71 32.9(3) . . . . ? 
C66 C61 B C71 -156.7(2) . . . . ? 
C62 C61 B C51 149.4(2) . . . . ? 
C66 C61 B C51 -40.2(3) . . . . ? 
C62 C61 B C81 -90.0(3) . . . . ? 
C66 C61 B C81 80.5(3) . . . . ? 
C72 C71 B C61 35.8(3) . . . . ? 
C76 C71 B C61 -151.9(2) . . . . ? 
C72 C71 B C51 -86.9(3) . . . . ? 
C76 C71 B C51 85.4(3) . . . . ? 
C72 C71 B C81 152.4(2) . . . . ? 
C76 C71 B C81 -35.3(3) . . . . ? 
C52 C51 B C61 152.9(2) . . . . ? 
C56 C51 B C61 -37.3(3) . . . . ? 
C52 C51 B C71 -84.3(3) . . . . ? 
C56 C51 B C71 85.5(3) . . . . ? 
C52 C51 B C81 37.6(3) . . . . ? 
C56 C51 B C81 -152.6(2) . . . . ? 
C82 C81 B C61 -78.4(3) . . . . ? 
C86 C81 B C61 92.8(3) . . . . ? 
C82 C81 B C71 158.7(2) . . . . ? 
C86 C81 B C71 -30.1(4) . . . . ? 
C82 C81 B C51 43.3(3) . . . . ? 
C86 C81 B C51 -145.5(3) . . . . ? 
 
_diffrn_measured_fraction_theta_max    0.993 
_diffrn_reflns_theta_full              27.54 
_diffrn_measured_fraction_theta_full   0.993 
_refine_diff_density_max    3.166 
_refine_diff_density_min   -1.444 
_refine_diff_density_rms    0.080 

#===END
 
data_8 
 
_audit_creation_method            SHELXL-97 

_publ_contact_author_name         'Martin Cowie'
_publ_contact_author_address
; Department of Chemistry
  University of Alberta
  Edmonton, Alberta T6G 2G2
  Canada
;
_publ_contact_author_email        martin.cowie@ualberta.ca
_publ_contact_author_fax          '1(780)4928231'
_publ_contact_author_phone        '1(780)4925581'
_publ_contact_letter
; To: Cambridge Crystallographic Data Centre
  Please accept the following CIF data for a structure we hope to
  publish in Organometallics.  Please forward any questions
  concerning this CIF to Bob McDonald (Bob.McDonald@ualberta.ca).
;
_publ_requested_journal
 'Organometallics'
_publ_section_title
;
C-F bond activation of fluoroolefins promoted by a
bis(diethylphosphino)methane-bridged diiridium hydride complex: role of
water in the activation processes
;
loop_
_publ_author_name
_publ_author_footnote
_publ_author_address
 'Slaney, Michael E.' .
; Department of Chemistry
  University of Alberta
  Edmonton, Alberta T6G 2G2
  Canada
;
 'Ferguson, Michael J.' 'X-ray Crystallography Laboratory'
; Department of Chemistry
  University of Alberta
  Edmonton, Alberta T6G 2G2
  Canada
;
 'McDonald, Robert' 'X-ray Crystallography Laboratory'
; Department of Chemistry
  University of Alberta
  Edmonton, Alberta T6G 2G2
  Canada
;
 'Cowie, Martin' .
; Department of Chemistry
  University of Alberta
  Edmonton, Alberta T6G 2G2
  Canada
;

_chemical_name_systematic 
; 
 ? 
; 
_chemical_name_common             ? 
_chemical_melting_point           ? 
_chemical_formula_moiety
 'C23 H45 F2 Ir2 O3 P4, C32 H12 B F24'
_chemical_formula_sum 
 'C55 H57 B F26 Ir2 O3 P4' 
_chemical_formula_weight          1779.10 
 
loop_ 
 _atom_type_symbol 
 _atom_type_description 
 _atom_type_scat_dispersion_real 
 _atom_type_scat_dispersion_imag 
 _atom_type_scat_source 
 'C'  'C'   0.0033   0.0016 
 'International Tables Vol C Tables 4.2.6.8 and 6.1.1.4' 
 'H'  'H'   0.0000   0.0000 
 'International Tables Vol C Tables 4.2.6.8 and 6.1.1.4' 
 'B'  'B'   0.0013   0.0007 
 'International Tables Vol C Tables 4.2.6.8 and 6.1.1.4' 
 'O'  'O'   0.0106   0.0060 
 'International Tables Vol C Tables 4.2.6.8 and 6.1.1.4' 
 'F'  'F'   0.0171   0.0103 
 'International Tables Vol C Tables 4.2.6.8 and 6.1.1.4' 
 'P'  'P'   0.1023   0.0942 
 'International Tables Vol C Tables 4.2.6.8 and 6.1.1.4' 
 'Ir'  'Ir'  -1.4442   7.9887 
 'International Tables Vol C Tables 4.2.6.8 and 6.1.1.4' 
 
_symmetry_cell_setting            Triclinic 
_symmetry_space_group_name_H-M    'P -1' 
_symmetry_space_group_name_Hall   '-P 1' 
 
loop_ 
 _symmetry_equiv_pos_as_xyz 
 'x, y, z' 
 '-x, -y, -z' 
 
_cell_length_a                    12.6522(6) 
_cell_length_b                    14.9899(7) 
_cell_length_c                    17.6977(8) 
_cell_angle_alpha                 97.0697(6) 
_cell_angle_beta                  97.5218(6) 
_cell_angle_gamma                 92.0058(6) 
_cell_volume                      3297.8(3) 
_cell_formula_units_Z             2 
_cell_measurement_temperature     173(2) 
_cell_measurement_reflns_used     9886 
_cell_measurement_theta_min       2.18 
_cell_measurement_theta_max       25.81 
 
_exptl_crystal_description        plate 
_exptl_crystal_colour             yellow 
_exptl_crystal_size_max           0.36 
_exptl_crystal_size_mid           0.25 
_exptl_crystal_size_min           0.11 
_exptl_crystal_density_meas       ? 
_exptl_crystal_density_diffrn     1.792 
_exptl_crystal_density_method     'not measured' 
_exptl_crystal_F_000              1728 
_exptl_absorpt_coefficient_mu     4.242 
_exptl_absorpt_correction_type    numerical 
_exptl_absorpt_correction_T_min   0.3096 
_exptl_absorpt_correction_T_max   0.6457 
_exptl_absorpt_process_details    'SADABS (Sheldrick, 2008)' 
 
_exptl_special_details 
; 
 ? 
; 
 
_diffrn_ambient_temperature       173(2) 
_diffrn_radiation_wavelength      0.71073 
_diffrn_radiation_type            MoK\a 
_diffrn_radiation_source          'fine-focus sealed tube' 
_diffrn_radiation_monochromator   graphite 
_diffrn_measurement_device_type   'Bruker APEX-II CCD' 
_diffrn_measurement_method        '\w scans' 
_diffrn_detector_area_resol_mean  ? 
_diffrn_reflns_number             27069 
_diffrn_reflns_av_R_equivalents   0.0214 
_diffrn_reflns_av_sigmaI/netI     0.0309 
_diffrn_reflns_limit_h_min        -15 
_diffrn_reflns_limit_h_max        15 
_diffrn_reflns_limit_k_min        -18 
_diffrn_reflns_limit_k_max        18 
_diffrn_reflns_limit_l_min        -22 
_diffrn_reflns_limit_l_max        22 
_diffrn_reflns_theta_min          1.63 
_diffrn_reflns_theta_max          26.58 
_reflns_number_total              13755 
_reflns_number_gt                 10661 
_reflns_threshold_expression      I>2\s(I) 
 
_computing_data_collection        'Bruker APEX2' 
_computing_cell_refinement        'Bruker SAINT' 
_computing_data_reduction         'Bruker SAINT' 
_computing_structure_solution     'SHELXS-97 (Sheldrick, 2008)' 
_computing_structure_refinement   'SHELXL-97 (Sheldrick, 2008)' 
_computing_molecular_graphics     'Bruker SHELXTL' 
_computing_publication_material   'Bruker SHELXTL' 
 
_refine_special_details 
; 
 Refinement of F^2^ against ALL reflections.  The weighted R-factor wR and 
 goodness of fit S are based on F^2^, conventional R-factors R are based 
 on F, with F set to zero for negative F^2^. The threshold expression of 
 F^2^ > 2sigma(F^2^) is used only for calculating R-factors(gt) etc. and is 
 not relevant to the choice of reflections for refinement.  R-factors based 
 on F^2^ are statistically about twice as large as those based on F, and R- 
 factors based on ALL data will be even larger. 
; 
 
_refine_ls_structure_factor_coef  Fsqd 
_refine_ls_matrix_type            full 
_refine_ls_weighting_scheme       calc 
_refine_ls_weighting_details 
 'calc w=1/[\s^2^(Fo^2^)+(0.0367P)^2^+34.5136P] where P=(Fo^2^+2Fc^2^)/3' 
_atom_sites_solution_primary      direct 
_atom_sites_solution_secondary    difmap 
_atom_sites_solution_hydrogens    geom 
_refine_ls_hydrogen_treatment     constr 
_refine_ls_extinction_method      none 
_refine_ls_extinction_coef        ? 
_refine_ls_number_reflns          13755 
_refine_ls_number_parameters      963 
_refine_ls_number_restraints      20 
_refine_ls_R_factor_all           0.0840 
_refine_ls_R_factor_gt            0.0645 
_refine_ls_wR_factor_ref          0.1504 
_refine_ls_wR_factor_gt           0.1394 
_refine_ls_goodness_of_fit_ref    1.071 
_refine_ls_restrained_S_all       1.070 
_refine_ls_shift/su_max           0.024 
_refine_ls_shift/su_mean          0.001 
 
loop_ 
 _atom_site_label 
 _atom_site_type_symbol 
 _atom_site_fract_x 
 _atom_site_fract_y 
 _atom_site_fract_z 
 _atom_site_U_iso_or_equiv 
 _atom_site_adp_type 
 _atom_site_occupancy 
 _atom_site_symmetry_multiplicity 
 _atom_site_calc_flag 
 _atom_site_refinement_flags 
 _atom_site_disorder_assembly 
 _atom_site_disorder_group 
Ir1 Ir 0.17582(3) -0.06571(2) 0.25828(2) 0.04923(11) Uani 1 1 d . . . 
Ir2 Ir -0.03326(3) -0.01207(3) 0.25816(3) 0.06695(15) Uani 1 1 d . A . 
H1 H -0.1169 0.0469 0.1936 0.080 Uiso 1 1 d RD . . 
P1A P 0.2378(6) 0.0634(5) 0.3534(4) 0.0442(16) Uani 0.50 1 d P A 1 
P1B P 0.2405(7) 0.0702(6) 0.3212(4) 0.0473(17) Uani 0.50 1 d P A 2 
P2 P 0.0159(2) 0.13054(18) 0.3226(2) 0.0706(8) Uani 1 1 d . . . 
P3 P 0.1194(2) -0.19670(17) 0.17262(15) 0.0561(6) Uani 1 1 d . A . 
P4 P -0.10562(19) -0.13909(16) 0.17735(16) 0.0559(6) Uani 1 1 d . . . 
F1 F 0.0174(7) 0.0930(6) 0.0884(6) 0.134(4) Uani 1 1 d . A . 
F2 F 0.1831(7) 0.0546(6) 0.0967(6) 0.123(3) Uani 1 1 d . A . 
O1 O 0.3923(7) -0.0758(7) 0.2017(7) 0.113(4) Uani 1 1 d . . . 
O2 O 0.1513(8) -0.1642(7) 0.3969(5) 0.098(3) Uani 1 1 d . . . 
O3 O -0.1135(14) -0.0742(9) 0.3975(7) 0.159(6) Uani 1 1 d . A . 
C1 C 0.3094(10) -0.0715(8) 0.2230(9) 0.082(4) Uani 1 1 d . A . 
C2 C 0.1629(9) -0.1276(8) 0.3443(7) 0.069(3) Uani 1 1 d . A . 
C3 C -0.0933(13) -0.0487(11) 0.3445(11) 0.113(6) Uani 1 1 d . . . 
C4 C 0.0775(10) 0.0065(8) 0.1873(8) 0.084(4) Uani 1 1 d . A . 
C5 C 0.0905(12) 0.0485(10) 0.1301(10) 0.104(5) Uani 1 1 d . . . 
C6 C 0.1562(9) 0.1615(7) 0.3262(8) 0.081(4) Uani 1 1 d . A . 
H6A H 0.1764 0.2152 0.3646 0.097 Uiso 1 1 calc R B 1 
H6B H 0.1706 0.1764 0.2754 0.097 Uiso 1 1 calc R B 1 
C7 C -0.0117(9) -0.1916(8) 0.1188(6) 0.071(3) Uani 1 1 d . A . 
H7A H -0.0394 -0.2534 0.0975 0.086 Uiso 1 1 calc R . . 
H7B H -0.0056 -0.1572 0.0751 0.086 Uiso 1 1 calc R . . 
C11A C 0.2337(19) 0.0523(15) 0.4541(13) 0.058(5) Uani 0.50 1 d P A 1 
H11A H 0.2370 0.1133 0.4834 0.070 Uiso 0.50 1 calc PR A 1 
H11B H 0.1644 0.0223 0.4590 0.070 Uiso 0.50 1 calc PR A 1 
C12A C 0.324(2) -0.0008(18) 0.4908(16) 0.082(7) Uani 0.50 1 d P A 1 
H12A H 0.3142 -0.0053 0.5443 0.098 Uiso 0.50 1 calc PR A 1 
H12B H 0.3926 0.0302 0.4892 0.098 Uiso 0.50 1 calc PR A 1 
H12C H 0.3215 -0.0614 0.4623 0.098 Uiso 0.50 1 calc PR A 1 
C13A C 0.3707(17) 0.1121(16) 0.3553(17) 0.072(6) Uani 0.50 1 d P A 1 
H13A H 0.3876 0.1566 0.4020 0.086 Uiso 0.50 1 calc PR A 1 
H13B H 0.4219 0.0640 0.3595 0.086 Uiso 0.50 1 calc PR A 1 
C14A C 0.387(2) 0.157(2) 0.2879(17) 0.081(8) Uani 0.50 1 d P A 1 
H14A H 0.4594 0.1837 0.2946 0.097 Uiso 0.50 1 calc PR A 1 
H14B H 0.3354 0.2039 0.2826 0.097 Uiso 0.50 1 calc PR A 1 
H14C H 0.3754 0.1124 0.2417 0.097 Uiso 0.50 1 calc PR A 1 
C11B C 0.276(2) 0.0677(19) 0.4235(15) 0.076(7) Uani 0.50 1 d P A 2 
H11C H 0.2899 0.1305 0.4486 0.091 Uiso 0.50 1 calc PR A 2 
H11D H 0.2127 0.0429 0.4435 0.091 Uiso 0.50 1 calc PR A 2 
C12B C 0.372(2) 0.013(2) 0.4483(16) 0.098(9) Uani 0.50 1 d P A 2 
H12D H 0.3867 0.0205 0.5045 0.117 Uiso 0.50 1 calc PR A 2 
H12E H 0.4344 0.0351 0.4273 0.117 Uiso 0.50 1 calc PR A 2 
H12F H 0.3560 -0.0505 0.4288 0.117 Uiso 0.50 1 calc PR A 2 
C13B C 0.367(2) 0.1072(17) 0.2938(17) 0.066(7) Uani 0.50 1 d P A 2 
H13C H 0.4213 0.0641 0.3084 0.079 Uiso 0.50 1 calc PR A 2 
H13D H 0.3588 0.1049 0.2372 0.079 Uiso 0.50 1 calc PR A 2 
C14B C 0.409(3) 0.202(2) 0.330(2) 0.116(14) Uani 0.50 1 d P A 2 
H14D H 0.4720 0.2197 0.3068 0.140 Uiso 0.50 1 calc PR A 2 
H14E H 0.4292 0.2032 0.3854 0.140 Uiso 0.50 1 calc PR A 2 
H14F H 0.3536 0.2451 0.3205 0.140 Uiso 0.50 1 calc PR A 2 
C21 C -0.0418(11) 0.2247(8) 0.2741(10) 0.108(5) Uani 1 1 d . A . 
H21A H -0.0088 0.2824 0.3019 0.130 Uiso 1 1 calc R . . 
H21B H -0.0231 0.2193 0.2212 0.130 Uiso 1 1 calc R . . 
C22 C -0.1580(13) 0.2273(13) 0.2703(15) 0.182(11) Uani 1 1 d . . . 
H22A H -0.1827 0.2786 0.2447 0.218 Uiso 1 1 calc R A . 
H22B H -0.1774 0.2337 0.3224 0.218 Uiso 1 1 calc R . . 
H22C H -0.1917 0.1714 0.2412 0.218 Uiso 1 1 calc R . . 
C23 C -0.0126(11) 0.1488(9) 0.4200(8) 0.096(4) Uani 1 1 d . A . 
H23A H -0.0907 0.1401 0.4189 0.115 Uiso 1 1 calc R . . 
H23B H 0.0210 0.1012 0.4476 0.115 Uiso 1 1 calc R . . 
C24 C 0.0233(15) 0.2407(10) 0.4681(11) 0.141(7) Uani 1 1 d . . . 
H24A H 0.0005 0.2423 0.5190 0.170 Uiso 1 1 calc R A . 
H24B H -0.0091 0.2891 0.4420 0.170 Uiso 1 1 calc R . . 
H24C H 0.1013 0.2489 0.4736 0.170 Uiso 1 1 calc R . . 
C31 C 0.1135(9) -0.2996(7) 0.2163(7) 0.069(3) Uani 1 1 d . . . 
H31A H 0.0692 -0.2905 0.2585 0.082 Uiso 1 1 calc R A . 
H31B H 0.0775 -0.3480 0.1775 0.082 Uiso 1 1 calc R . . 
C32 C 0.2228(9) -0.3311(8) 0.2488(8) 0.084(4) Uani 1 1 d . A . 
H32A H 0.2125 -0.3871 0.2710 0.101 Uiso 1 1 calc R . . 
H32B H 0.2583 -0.2847 0.2888 0.101 Uiso 1 1 calc R . . 
H32C H 0.2670 -0.3417 0.2074 0.101 Uiso 1 1 calc R . . 
C33 C 0.2029(11) -0.2288(9) 0.0985(7) 0.089(4) Uani 1 1 d . . . 
H33A H 0.2769 -0.2331 0.1237 0.107 Uiso 1 1 calc R A . 
H33B H 0.1777 -0.2894 0.0724 0.107 Uiso 1 1 calc R . . 
C34 C 0.2050(14) -0.1661(12) 0.0387(9) 0.125(6) Uani 1 1 d . A . 
H34A H 0.2534 -0.1879 0.0023 0.150 Uiso 1 1 calc R . . 
H34B H 0.2301 -0.1057 0.0636 0.150 Uiso 1 1 calc R . . 
H34C H 0.1330 -0.1639 0.0111 0.150 Uiso 1 1 calc R . . 
C41 C -0.1590(8) -0.2275(7) 0.2262(7) 0.072(3) Uani 1 1 d . A . 
H41A H -0.1029 -0.2407 0.2672 0.087 Uiso 1 1 calc R . . 
H41B H -0.2192 -0.2035 0.2516 0.087 Uiso 1 1 calc R . . 
C42 C -0.1977(10) -0.3149(7) 0.1775(10) 0.106(5) Uani 1 1 d . . . 
H42A H -0.2236 -0.3570 0.2100 0.128 Uiso 1 1 calc R A . 
H42B H -0.1388 -0.3407 0.1528 0.128 Uiso 1 1 calc R . . 
H42C H -0.2559 -0.3039 0.1380 0.128 Uiso 1 1 calc R . . 
C43A C -0.228(5) -0.119(3) 0.123(2) 0.068(7) Uani 0.40 1 d PD A 1 
H43A H -0.2565 -0.1754 0.0914 0.082 Uiso 0.40 1 calc PR A 1 
H43B H -0.2795 -0.1009 0.1591 0.082 Uiso 0.40 1 calc PR A 1 
C43B C -0.212(3) -0.1219(19) 0.0931(11) 0.068(7) Uani 0.60 1 d P A 2 
H43C H -0.1850 -0.0768 0.0630 0.082 Uiso 0.60 1 calc PR A 2 
H43D H -0.2290 -0.1792 0.0587 0.082 Uiso 0.60 1 calc PR A 2 
C44A C -0.219(3) -0.047(2) 0.0720(16) 0.095(11) Uani 0.40 1 d PD A 1 
H44A H -0.2796 -0.0548 0.0307 0.114 Uiso 0.40 1 calc PR A 1 
H44B H -0.1523 -0.0521 0.0497 0.114 Uiso 0.40 1 calc PR A 1 
H44C H -0.2198 0.0123 0.1020 0.114 Uiso 0.40 1 calc PRD A 1 
C44B C -0.3113(15) -0.0901(13) 0.1239(12) 0.079(6) Uani 0.60 1 d P A 2 
H44D H -0.3637 -0.0768 0.0813 0.095 Uiso 0.60 1 calc PR A 2 
H44E H -0.2935 -0.0356 0.1606 0.095 Uiso 0.60 1 calc PR A 2 
H44F H -0.3415 -0.1372 0.1497 0.095 Uiso 0.60 1 calc PR A 2 
F51 F 0.2870(5) 0.5103(5) 0.4318(4) 0.085(2) Uani 1 1 d . . . 
F52 F 0.2465(5) 0.3735(5) 0.4047(5) 0.108(3) Uani 1 1 d . . . 
F53 F 0.3153(6) 0.4265(6) 0.5188(4) 0.111(3) Uani 1 1 d . . . 
F54A F 0.7597(19) 0.276(2) 0.4697(18) 0.140(15) Uani 0.50 1 d PD C 1 
F55A F 0.6636(19) 0.3070(10) 0.5632(9) 0.094(6) Uani 0.50 1 d PD C 1 
F56A F 0.6147(18) 0.1934(10) 0.4741(12) 0.120(8) Uani 0.50 1 d PD C 1 
F54B F 0.7633(17) 0.3145(14) 0.4907(17) 0.100(8) Uani 0.50 1 d PD D 2 
F55B F 0.6365(18) 0.2523(19) 0.5428(13) 0.148(13) Uani 0.50 1 d PD D 2 
F56B F 0.673(2) 0.1925(12) 0.4305(13) 0.161(11) Uani 0.50 1 d PD D 2 
F61 F 0.5628(8) 0.0905(5) 0.1726(5) 0.120(3) Uani 1 1 d . . . 
F62 F 0.6022(9) 0.1273(5) 0.0718(6) 0.147(4) Uani 1 1 d . . . 
F63 F 0.4550(7) 0.0638(5) 0.0772(7) 0.158(5) Uani 1 1 d . . . 
F64A F 0.1687(13) 0.2704(19) 0.0499(13) 0.099(5) Uani 0.60 1 d P E 1 
F65A F 0.2006(16) 0.4031(19) 0.092(3) 0.147(12) Uani 0.60 1 d P E 1 
F66A F 0.1651(14) 0.314(3) 0.1659(12) 0.141(12) Uani 0.60 1 d P E 1 
F64B F 0.1814(19) 0.392(3) 0.149(3) 0.13(2) Uani 0.40 1 d P E 2 
F65B F 0.1562(16) 0.255(2) 0.117(4) 0.131(13) Uani 0.40 1 d P E 2 
F66B F 0.195(2) 0.340(4) 0.0381(13) 0.109(10) Uani 0.40 1 d P E 2 
F71 F 0.6086(7) 0.8588(4) 0.3182(4) 0.099(2) Uani 1 1 d . . . 
F72 F 0.6046(8) 0.7700(4) 0.4017(4) 0.117(3) Uani 1 1 d . . . 
F73 F 0.4640(7) 0.8196(6) 0.3516(5) 0.116(3) Uani 1 1 d . . . 
F74 F 0.4708(9) 0.7558(6) 0.0491(4) 0.134(4) Uani 1 1 d . . . 
F75 F 0.5591(7) 0.6468(7) 0.0192(4) 0.133(4) Uani 1 1 d . . . 
F76 F 0.3984(8) 0.6308(8) 0.0233(4) 0.152(5) Uani 1 1 d . . . 
F81A F 1.037(2) 0.4660(15) 0.3880(13) 0.138(7) Uani 0.70 1 d P F 1 
F82A F 0.9298(11) 0.5511(18) 0.4301(7) 0.100(5) Uani 0.70 1 d P F 1 
F83A F 1.031(3) 0.595(2) 0.3602(9) 0.145(8) Uani 0.70 1 d P F 1 
F81B F 0.954(4) 0.6169(17) 0.384(3) 0.15(2) Uani 0.30 1 d PD F 2 
F82B F 1.0707(12) 0.520(4) 0.3497(16) 0.099(11) Uani 0.30 1 d PD F 2 
F83B F 0.954(3) 0.484(4) 0.4244(19) 0.15(2) Uani 0.30 1 d PD F 2 
F84 F 0.8187(5) 0.4371(6) 0.0288(3) 0.097(2) Uani 1 1 d . . . 
F85 F 0.9718(7) 0.4877(9) 0.0806(4) 0.147(4) Uani 1 1 d . . . 
F86 F 0.9337(8) 0.3521(8) 0.0745(5) 0.138(4) Uani 1 1 d . . . 
C51 C 0.5552(6) 0.4234(5) 0.3312(4) 0.0402(17) Uani 1 1 d . . . 
C52 C 0.4594(6) 0.4452(6) 0.3592(5) 0.0430(18) Uani 1 1 d . . . 
H52 H 0.4138 0.4838 0.3329 0.052 Uiso 1 1 calc R . . 
C53 C 0.4282(7) 0.4129(7) 0.4236(5) 0.051(2) Uani 1 1 d . . . 
C54 C 0.4942(9) 0.3594(8) 0.4643(6) 0.066(3) Uani 1 1 d . . . 
H54 H 0.4743 0.3385 0.5092 0.080 Uiso 1 1 calc R . . 
C55 C 0.5897(8) 0.3365(8) 0.4394(6) 0.066(3) Uani 1 1 d . . . 
C56 C 0.6185(7) 0.3675(7) 0.3740(5) 0.053(2) Uani 1 1 d . . . 
H56 H 0.6841 0.3500 0.3574 0.064 Uiso 1 1 calc R . . 
C57 C 0.3209(8) 0.4307(8) 0.4451(6) 0.062(3) Uani 1 1 d . . . 
C58A C 0.6591(17) 0.2779(12) 0.4876(10) 0.097(5) Uani 0.50 1 d PD C 1 
C58B C 0.6661(17) 0.2708(13) 0.4757(12) 0.097(5) Uani 0.50 1 d PD D 2 
C61 C 0.5104(6) 0.3702(5) 0.1894(4) 0.0374(17) Uani 1 1 d . . . 
C62 C 0.5467(6) 0.2857(5) 0.1678(5) 0.0426(18) Uani 1 1 d . . . 
H62 H 0.6204 0.2761 0.1805 0.051 Uiso 1 1 calc R . . 
C63 C 0.4804(7) 0.2148(6) 0.1285(5) 0.048(2) Uani 1 1 d . . . 
C64 C 0.3719(7) 0.2266(6) 0.1073(5) 0.052(2) Uani 1 1 d . . . 
H64 H 0.3260 0.1788 0.0797 0.063 Uiso 1 1 calc R . . 
C65 C 0.3341(7) 0.3093(6) 0.1278(5) 0.047(2) Uani 1 1 d . E . 
C66 C 0.4005(6) 0.3796(6) 0.1670(4) 0.0400(17) Uani 1 1 d . . . 
H66 H 0.3713 0.4362 0.1794 0.048 Uiso 1 1 calc R . . 
C67 C 0.5253(9) 0.1248(7) 0.1099(7) 0.065(3) Uani 1 1 d . . . 
C68 C 0.2173(8) 0.3242(8) 0.1088(7) 0.064(3) Uani 1 1 d . . . 
C71 C 0.5472(6) 0.5500(5) 0.2327(4) 0.0368(16) Uani 1 1 d . . . 
C72 C 0.5576(6) 0.6234(5) 0.2903(5) 0.0419(18) Uani 1 1 d . . . 
H72 H 0.5743 0.6134 0.3423 0.050 Uiso 1 1 calc R . . 
C73 C 0.5441(7) 0.7106(6) 0.2737(5) 0.049(2) Uani 1 1 d . . . 
C74 C 0.5179(7) 0.7281(6) 0.1984(5) 0.050(2) Uani 1 1 d . . . 
H74 H 0.5079 0.7878 0.1869 0.060 Uiso 1 1 calc R . . 
C75 C 0.5071(6) 0.6563(6) 0.1410(5) 0.0447(19) Uani 1 1 d . . . 
C76 C 0.5209(6) 0.5691(6) 0.1580(4) 0.0390(17) Uani 1 1 d . . . 
H76 H 0.5121 0.5209 0.1171 0.047 Uiso 1 1 calc R . . 
C77 C 0.5575(10) 0.7884(7) 0.3359(6) 0.066(3) Uani 1 1 d . . . 
C78 C 0.4849(8) 0.6720(7) 0.0592(5) 0.057(2) Uani 1 1 d . . . 
C81 C 0.7088(6) 0.4516(5) 0.2412(4) 0.0342(15) Uani 1 1 d . . . 
C82 C 0.7853(6) 0.4835(5) 0.3040(5) 0.0406(17) Uani 1 1 d . . . 
H82 H 0.7625 0.4982 0.3529 0.049 Uiso 1 1 calc R . . 
C83 C 0.8923(7) 0.4945(6) 0.2979(5) 0.0462(19) Uani 1 1 d . F . 
C84 C 0.9285(6) 0.4766(6) 0.2276(5) 0.048(2) Uani 1 1 d . . . 
H84 H 1.0023 0.4834 0.2234 0.057 Uiso 1 1 calc R . . 
C85 C 0.8547(6) 0.4483(6) 0.1630(5) 0.0461(19) Uani 1 1 d . . . 
C86 C 0.7470(6) 0.4352(5) 0.1704(4) 0.0391(17) Uani 1 1 d . . . 
H86 H 0.6979 0.4143 0.1258 0.047 Uiso 1 1 calc R . . 
C87 C 0.9708(7) 0.5292(8) 0.3664(6) 0.069(3) Uani 1 1 d D . . 
C88 C 0.8922(9) 0.4335(10) 0.0861(7) 0.083(4) Uani 1 1 d . . . 
B B 0.5811(7) 0.4483(6) 0.2487(5) 0.0375(19) Uani 1 1 d . . . 
 
loop_ 
 _atom_site_aniso_label 
 _atom_site_aniso_U_11 
 _atom_site_aniso_U_22 
 _atom_site_aniso_U_33 
 _atom_site_aniso_U_23 
 _atom_site_aniso_U_13 
 _atom_site_aniso_U_12 
Ir1 0.03993(18) 0.03773(18) 0.0710(2) 0.01278(16) 0.00582(16) 0.00187(13) 
Ir2 0.0379(2) 0.0556(2) 0.0996(4) -0.0069(2) -0.00351(19) 0.00185(16) 
P1A 0.037(3) 0.042(3) 0.052(5) 0.015(3) -0.007(3) 0.000(2) 
P1B 0.050(3) 0.042(3) 0.047(4) 0.015(3) -0.006(4) -0.005(2) 
P2 0.0545(15) 0.0447(14) 0.108(2) 0.0031(14) -0.0055(15) 0.0150(12) 
P3 0.0579(15) 0.0521(14) 0.0579(15) 0.0067(11) 0.0066(12) 0.0053(11) 
P4 0.0463(13) 0.0445(13) 0.0735(17) 0.0150(12) -0.0105(12) -0.0019(10) 
F1 0.126(7) 0.112(7) 0.167(9) 0.078(6) -0.029(6) 0.028(5) 
F2 0.109(6) 0.109(6) 0.164(8) 0.080(6) 0.018(6) -0.015(5) 
O1 0.075(6) 0.100(7) 0.190(11) 0.071(7) 0.055(7) 0.024(5) 
O2 0.108(7) 0.111(7) 0.079(6) 0.044(5) 0.000(5) 0.001(6) 
O3 0.259(18) 0.123(10) 0.093(8) -0.007(7) 0.039(10) -0.009(10) 
C1 0.065(7) 0.058(7) 0.134(11) 0.036(7) 0.023(7) 0.011(5) 
C2 0.062(6) 0.063(7) 0.078(8) 0.004(6) 0.001(6) -0.002(5) 
C3 0.108(11) 0.103(11) 0.123(13) -0.043(10) 0.069(10) -0.047(9) 
C4 0.070(7) 0.061(7) 0.123(11) 0.038(7) -0.001(7) 0.008(6) 
C5 0.085(9) 0.088(10) 0.149(14) 0.060(10) 0.011(9) 0.008(7) 
C6 0.066(7) 0.038(5) 0.135(11) 0.005(6) 0.005(7) 0.001(5) 
C7 0.072(7) 0.070(7) 0.068(7) 0.006(5) -0.006(5) -0.001(6) 
C11A 0.066(14) 0.054(12) 0.053(13) 0.004(10) 0.003(10) 0.009(10) 
C12A 0.086(18) 0.079(17) 0.080(18) 0.012(14) 0.003(14) 0.013(14) 
C13A 0.053(12) 0.068(15) 0.095(19) 0.008(13) 0.014(12) -0.003(10) 
C14A 0.080(19) 0.09(2) 0.08(2) 0.019(19) 0.034(16) 0.001(18) 
C11B 0.080(18) 0.086(18) 0.065(18) 0.018(13) 0.017(14) 0.007(14) 
C12B 0.085(19) 0.13(3) 0.072(18) 0.026(17) -0.017(14) 0.032(18) 
C13B 0.077(16) 0.049(14) 0.070(17) 0.003(12) 0.015(12) -0.026(12) 
C14B 0.12(2) 0.10(2) 0.12(3) -0.048(19) 0.07(2) -0.075(19) 
C21 0.086(9) 0.057(7) 0.177(16) 0.021(8) -0.010(9) 0.031(7) 
C22 0.101(13) 0.143(17) 0.33(3) 0.111(19) 0.038(16) 0.068(12) 
C23 0.093(9) 0.071(8) 0.113(11) -0.021(7) 0.008(8) -0.008(7) 
C24 0.162(17) 0.095(11) 0.157(16) -0.051(11) 0.057(13) -0.041(11) 
C31 0.066(6) 0.050(6) 0.090(8) 0.018(5) 0.000(6) 0.010(5) 
C32 0.067(7) 0.064(7) 0.126(11) 0.029(7) 0.008(7) 0.013(6) 
C33 0.102(10) 0.098(10) 0.071(8) 0.007(7) 0.029(7) 0.016(8) 
C34 0.131(14) 0.168(17) 0.097(11) 0.056(11) 0.051(10) 0.051(12) 
C41 0.049(6) 0.065(7) 0.110(9) 0.034(6) 0.015(6) 0.006(5) 
C42 0.065(7) 0.046(6) 0.211(17) 0.026(8) 0.020(9) -0.010(5) 
C43A 0.082(15) 0.065(8) 0.049(17) 0.016(13) -0.027(17) -0.001(8) 
C43B 0.082(15) 0.065(8) 0.049(17) 0.016(13) -0.027(17) -0.001(8) 
C44A 0.14(3) 0.08(2) 0.060(18) 0.013(16) -0.008(19) 0.04(2) 
C44B 0.064(11) 0.071(12) 0.094(14) 0.006(10) -0.026(10) 0.027(10) 
F51 0.064(4) 0.088(5) 0.111(5) 0.019(4) 0.029(4) 0.024(3) 
F52 0.058(4) 0.108(6) 0.152(7) -0.036(5) 0.042(4) -0.015(4) 
F53 0.101(5) 0.182(8) 0.067(4) 0.035(5) 0.049(4) 0.048(5) 
F54A 0.115(19) 0.18(3) 0.18(3) 0.14(3) 0.08(2) 0.11(2) 
F55A 0.126(15) 0.089(12) 0.068(9) 0.047(9) -0.019(9) -0.004(11) 
F56A 0.18(2) 0.074(11) 0.104(15) 0.033(11) -0.032(14) 0.043(13) 
F54B 0.085(13) 0.118(17) 0.106(13) 0.044(12) 0.007(10) 0.065(11) 
F55B 0.114(19) 0.21(3) 0.17(3) 0.16(3) 0.062(19) 0.08(2) 
F56B 0.17(2) 0.122(18) 0.22(3) 0.12(2) 0.03(2) 0.078(17) 
F61 0.169(8) 0.090(5) 0.114(6) 0.041(5) 0.019(6) 0.064(6) 
F62 0.199(10) 0.070(5) 0.215(10) 0.042(6) 0.150(9) 0.061(6) 
F63 0.113(7) 0.066(5) 0.258(13) -0.055(6) -0.040(7) 0.013(5) 
F64A 0.053(8) 0.132(15) 0.094(13) -0.015(10) -0.028(8) 0.003(9) 
F65A 0.052(10) 0.107(16) 0.28(4) 0.07(2) -0.03(2) 0.014(10) 
F66A 0.051(9) 0.30(4) 0.078(11) 0.021(18) 0.019(8) 0.014(19) 
F64B 0.033(12) 0.14(3) 0.18(4) -0.10(3) -0.009(18) 0.023(18) 
F65B 0.037(9) 0.11(2) 0.26(4) 0.09(3) 0.01(2) -0.024(11) 
F66B 0.067(15) 0.19(3) 0.065(13) 0.025(19) -0.012(10) 0.02(2) 
F71 0.158(7) 0.056(4) 0.084(5) -0.004(3) 0.043(5) -0.018(4) 
F72 0.221(10) 0.056(4) 0.059(4) -0.007(3) -0.020(5) 0.012(5) 
F73 0.128(7) 0.108(6) 0.112(6) -0.026(5) 0.053(5) 0.023(5) 
F74 0.248(11) 0.105(6) 0.062(4) 0.047(4) 0.013(6) 0.064(7) 
F75 0.131(7) 0.238(11) 0.059(4) 0.073(6) 0.047(4) 0.096(7) 
F76 0.126(7) 0.253(13) 0.069(5) 0.076(6) -0.047(5) -0.068(8) 
F81A 0.106(12) 0.147(14) 0.130(15) -0.014(11) -0.074(10) 0.054(12) 
F82A 0.078(7) 0.164(15) 0.047(6) 0.000(8) -0.014(5) -0.010(10) 
F83A 0.160(17) 0.18(2) 0.072(9) 0.021(12) -0.033(11) -0.120(14) 
F81B 0.12(3) 0.14(3) 0.14(4) -0.10(3) -0.07(3) 0.02(3) 
F82B 0.028(10) 0.17(4) 0.09(2) 0.00(2) -0.021(11) -0.001(17) 
F83B 0.13(4) 0.20(5) 0.10(3) 0.08(3) -0.09(3) -0.06(4) 
F84 0.062(4) 0.188(8) 0.042(3) 0.005(4) 0.014(3) 0.019(4) 
F85 0.098(6) 0.269(13) 0.072(5) -0.003(6) 0.043(4) -0.064(7) 
F86 0.135(8) 0.188(10) 0.091(6) -0.025(6) 0.030(5) 0.087(7) 
C51 0.039(4) 0.044(4) 0.039(4) 0.012(3) 0.002(3) 0.007(3) 
C52 0.041(4) 0.050(5) 0.038(4) 0.010(4) 0.002(3) 0.004(4) 
C53 0.051(5) 0.066(6) 0.040(5) 0.017(4) 0.011(4) 0.006(4) 
C54 0.072(7) 0.091(8) 0.046(5) 0.034(5) 0.019(5) 0.011(6) 
C55 0.065(6) 0.090(8) 0.056(6) 0.045(6) 0.015(5) 0.025(6) 
C56 0.047(5) 0.069(6) 0.051(5) 0.027(5) 0.015(4) 0.014(4) 
C57 0.061(6) 0.076(7) 0.054(6) 0.012(5) 0.021(5) 0.002(5) 
C58A 0.088(10) 0.152(16) 0.077(10) 0.080(11) 0.034(9) 0.051(11) 
C58B 0.088(10) 0.152(16) 0.077(10) 0.080(11) 0.034(9) 0.051(11) 
C61 0.033(4) 0.046(4) 0.036(4) 0.015(3) 0.006(3) 0.004(3) 
C62 0.038(4) 0.044(4) 0.047(5) 0.014(4) 0.001(3) 0.002(3) 
C63 0.052(5) 0.041(5) 0.051(5) 0.008(4) 0.003(4) 0.002(4) 
C64 0.047(5) 0.053(5) 0.054(5) 0.013(4) -0.003(4) -0.011(4) 
C65 0.041(4) 0.056(5) 0.045(5) 0.012(4) 0.003(4) -0.003(4) 
C66 0.036(4) 0.047(5) 0.038(4) 0.008(3) 0.006(3) 0.007(3) 
C67 0.064(6) 0.047(6) 0.081(7) 0.006(5) 0.004(6) 0.004(5) 
C68 0.044(5) 0.079(8) 0.066(7) 0.009(6) -0.003(5) -0.002(5) 
C71 0.032(4) 0.044(4) 0.036(4) 0.010(3) 0.006(3) 0.004(3) 
C72 0.045(4) 0.046(5) 0.036(4) 0.009(3) 0.007(3) 0.009(4) 
C73 0.054(5) 0.049(5) 0.047(5) 0.011(4) 0.011(4) 0.010(4) 
C74 0.053(5) 0.047(5) 0.057(5) 0.017(4) 0.018(4) 0.020(4) 
C75 0.036(4) 0.059(5) 0.043(5) 0.017(4) 0.010(3) 0.013(4) 
C76 0.033(4) 0.047(4) 0.038(4) 0.010(3) 0.003(3) 0.008(3) 
C77 0.098(8) 0.049(6) 0.056(6) 0.013(5) 0.025(6) 0.015(6) 
C78 0.064(6) 0.074(7) 0.041(5) 0.031(5) 0.007(4) 0.021(5) 
C81 0.038(4) 0.031(4) 0.035(4) 0.009(3) 0.004(3) 0.006(3) 
C82 0.040(4) 0.045(4) 0.036(4) 0.006(3) -0.001(3) 0.006(3) 
C83 0.040(4) 0.052(5) 0.044(5) 0.008(4) -0.004(4) 0.003(4) 
C84 0.033(4) 0.050(5) 0.060(5) 0.009(4) 0.002(4) 0.007(4) 
C85 0.038(4) 0.056(5) 0.043(5) 0.004(4) 0.006(4) 0.008(4) 
C86 0.038(4) 0.046(4) 0.033(4) 0.004(3) 0.001(3) 0.004(3) 
C87 0.049(6) 0.100(9) 0.054(6) 0.008(6) -0.004(5) -0.006(6) 
C88 0.045(6) 0.137(12) 0.062(7) -0.016(7) 0.017(5) 0.006(7) 
B 0.034(4) 0.043(5) 0.036(5) 0.006(4) 0.004(3) 0.005(4) 
 
_geom_special_details 
; 
 All esds (except the esd in the dihedral angle between two l.s. planes) 
 are estimated using the full covariance matrix.  The cell esds are taken 
 into account individually in the estimation of esds in distances, angles 
 and torsion angles; correlations between esds in cell parameters are only 
 used when they are defined by crystal symmetry.  An approximate (isotropic) 
 treatment of cell esds is used for estimating esds involving l.s. planes. 
; 
 
loop_ 
 _geom_bond_atom_site_label_1 
 _geom_bond_atom_site_label_2 
 _geom_bond_distance 
 _geom_bond_site_symmetry_2 
 _geom_bond_publ_flag 
Ir1 C1 1.879(12) . ? 
Ir1 C2 1.900(13) . ? 
Ir1 C4 2.079(11) . ? 
Ir1 P1B 2.268(9) . ? 
Ir1 P3 2.356(3) . ? 
Ir1 P1A 2.438(8) . ? 
Ir1 Ir2 2.7914(5) . ? 
Ir2 C3 1.922(16) . ? 
Ir2 C4 2.033(14) . ? 
Ir2 P4 2.318(3) . ? 
Ir2 P2 2.319(3) . ? 
P1A C13A 1.80(2) . ? 
P1A C11A 1.82(2) . ? 
P1A C6 1.900(13) . ? 
P1B C6 1.765(14) . ? 
P1B C11B 1.81(3) . ? 
P1B C13B 1.82(3) . ? 
P2 C23 1.797(14) . ? 
P2 C6 1.810(11) . ? 
P2 C21 1.863(12) . ? 
P3 C7 1.810(11) . ? 
P3 C31 1.812(10) . ? 
P3 C33 1.820(12) . ? 
P4 C43A 1.76(6) . ? 
P4 C7 1.815(12) . ? 
P4 C41 1.825(10) . ? 
P4 C43B 1.92(3) . ? 
F1 C5 1.353(15) . ? 
F2 C5 1.386(16) . ? 
O1 C1 1.161(13) . ? 
O2 C2 1.159(13) . ? 
O3 C3 1.111(18) . ? 
C4 C5 1.280(18) . ? 
C11A C12A 1.53(3) . ? 
C13A C14A 1.47(3) . ? 
C11B C12B 1.54(4) . ? 
C13B C14B 1.54(3) . ? 
C21 C22 1.47(2) . ? 
C23 C24 1.547(17) . ? 
C31 C32 1.539(14) . ? 
C33 C34 1.502(18) . ? 
C41 C42 1.505(16) . ? 
C43A C44A 1.499(10) . ? 
C43B C44B 1.50(4) . ? 
F51 C57 1.320(12) . ? 
F52 C57 1.321(12) . ? 
F53 C57 1.324(11) . ? 
F54A C58A 1.351(10) . ? 
F55A C58A 1.349(10) . ? 
F56A C58A 1.349(10) . ? 
F54B C58B 1.351(10) . ? 
F55B C58B 1.349(10) . ? 
F56B C58B 1.350(10) . ? 
F61 C67 1.320(13) . ? 
F62 C67 1.256(13) . ? 
F63 C67 1.281(12) . ? 
F64A C68 1.305(18) . ? 
F65A C68 1.27(2) . ? 
F66A C68 1.30(2) . ? 
F64B C68 1.29(3) . ? 
F65B C68 1.30(2) . ? 
F66B C68 1.30(3) . ? 
F71 C77 1.310(12) . ? 
F72 C77 1.302(12) . ? 
F73 C77 1.338(13) . ? 
F74 C78 1.305(12) . ? 
F75 C78 1.288(11) . ? 
F76 C78 1.286(13) . ? 
F81A C87 1.342(18) . ? 
F82A C87 1.313(17) . ? 
F83A C87 1.247(16) . ? 
F81B C87 1.344(9) . ? 
F82B C87 1.342(9) . ? 
F83B C87 1.336(9) . ? 
F84 C88 1.291(13) . ? 
F85 C88 1.294(15) . ? 
F86 C88 1.348(16) . ? 
C51 C56 1.401(11) . ? 
C51 C52 1.402(11) . ? 
C51 B 1.622(11) . ? 
C52 C53 1.391(11) . ? 
C53 C54 1.374(13) . ? 
C53 C57 1.482(13) . ? 
C54 C55 1.379(14) . ? 
C55 C56 1.385(12) . ? 
C55 C58A 1.52(2) . ? 
C55 C58B 1.54(2) . ? 
C61 C62 1.389(11) . ? 
C61 C66 1.412(10) . ? 
C61 B 1.629(12) . ? 
C62 C63 1.385(12) . ? 
C63 C64 1.397(12) . ? 
C63 C67 1.499(13) . ? 
C64 C65 1.368(13) . ? 
C65 C66 1.380(12) . ? 
C65 C68 1.502(13) . ? 
C71 C76 1.387(10) . ? 
C71 C72 1.395(11) . ? 
C71 B 1.646(11) . ? 
C72 C73 1.386(11) . ? 
C73 C74 1.390(12) . ? 
C73 C77 1.489(13) . ? 
C74 C75 1.376(12) . ? 
C75 C76 1.390(11) . ? 
C75 C78 1.487(11) . ? 
C81 C82 1.398(10) . ? 
C81 C86 1.399(10) . ? 
C81 B 1.637(11) . ? 
C82 C83 1.379(11) . ? 
C83 C84 1.380(12) . ? 
C83 C87 1.490(12) . ? 
C84 C85 1.390(12) . ? 
C85 C86 1.395(11) . ? 
C85 C88 1.493(13) . ? 
 
loop_ 
 _geom_angle_atom_site_label_1 
 _geom_angle_atom_site_label_2 
 _geom_angle_atom_site_label_3 
 _geom_angle 
 _geom_angle_site_symmetry_1 
 _geom_angle_site_symmetry_3 
 _geom_angle_publ_flag 
C1 Ir1 C2 114.9(5) . . ? 
C1 Ir1 C4 108.4(5) . . ? 
C2 Ir1 C4 136.7(5) . . ? 
C1 Ir1 P1B 84.8(5) . . ? 
C2 Ir1 P1B 99.2(4) . . ? 
C4 Ir1 P1B 86.0(4) . . ? 
C1 Ir1 P3 88.3(4) . . ? 
C2 Ir1 P3 91.3(3) . . ? 
C4 Ir1 P3 88.3(4) . . ? 
P1B Ir1 P3 169.20(18) . . ? 
C1 Ir1 P1A 91.8(5) . . ? 
C2 Ir1 P1A 85.2(4) . . ? 
C4 Ir1 P1A 95.2(4) . . ? 
P3 Ir1 P1A 176.19(17) . . ? 
C1 Ir1 Ir2 154.9(4) . . ? 
C2 Ir1 Ir2 90.2(3) . . ? 
C4 Ir1 Ir2 46.6(4) . . ? 
P1B Ir1 Ir2 90.8(2) . . ? 
P3 Ir1 Ir2 91.96(7) . . ? 
P1A Ir1 Ir2 89.55(19) . . ? 
C3 Ir2 C4 158.7(7) . . ? 
C3 Ir2 P4 92.7(4) . . ? 
C4 Ir2 P4 90.6(4) . . ? 
C3 Ir2 P2 92.2(4) . . ? 
C4 Ir2 P2 88.7(4) . . ? 
P4 Ir2 P2 168.29(10) . . ? 
C3 Ir2 Ir1 110.9(6) . . ? 
C4 Ir2 Ir1 47.9(3) . . ? 
P4 Ir2 Ir1 93.44(6) . . ? 
P2 Ir2 Ir1 94.73(7) . . ? 
C13A P1A C11A 102.1(13) . . ? 
C13A P1A C6 99.9(9) . . ? 
C11A P1A C6 109.5(9) . . ? 
C13A P1A Ir1 118.8(10) . . ? 
C11A P1A Ir1 118.1(8) . . ? 
C6 P1A Ir1 106.8(5) . . ? 
C6 P1B C11B 97.9(11) . . ? 
C6 P1B C13B 109.2(10) . . ? 
C11B P1B C13B 101.8(14) . . ? 
C6 P1B Ir1 119.8(6) . . ? 
C11B P1B Ir1 112.4(10) . . ? 
C13B P1B Ir1 113.3(9) . . ? 
C23 P2 C6 106.3(7) . . ? 
C23 P2 C21 106.5(7) . . ? 
C6 P2 C21 99.0(6) . . ? 
C23 P2 Ir2 115.1(4) . . ? 
C6 P2 Ir2 113.5(4) . . ? 
C21 P2 Ir2 114.8(5) . . ? 
C7 P3 C31 105.0(5) . . ? 
C7 P3 C33 103.5(6) . . ? 
C31 P3 C33 100.8(6) . . ? 
C7 P3 Ir1 114.0(4) . . ? 
C31 P3 Ir1 115.3(4) . . ? 
C33 P3 Ir1 116.6(5) . . ? 
C43A P4 C7 113.1(16) . . ? 
C43A P4 C41 96.2(13) . . ? 
C7 P4 C41 106.3(5) . . ? 
C7 P4 C43B 96.1(10) . . ? 
C41 P4 C43B 107.0(10) . . ? 
C43A P4 Ir2 112.0(15) . . ? 
C7 P4 Ir2 113.3(4) . . ? 
C41 P4 Ir2 114.6(4) . . ? 
C43B P4 Ir2 117.5(9) . . ? 
O1 C1 Ir1 179.2(11) . . ? 
O2 C2 Ir1 177.5(11) . . ? 
O3 C3 Ir2 170(2) . . ? 
C5 C4 Ir2 139.8(11) . . ? 
C5 C4 Ir1 134.4(11) . . ? 
Ir2 C4 Ir1 85.5(5) . . ? 
C4 C5 F1 127.9(14) . . ? 
C4 C5 F2 126.2(13) . . ? 
F1 C5 F2 105.8(12) . . ? 
P1B C6 P2 114.9(6) . . ? 
P2 C6 P1A 109.0(6) . . ? 
P3 C7 P4 112.4(6) . . ? 
C12A C11A P1A 114.7(18) . . ? 
C14A C13A P1A 115(2) . . ? 
C12B C11B P1B 117(2) . . ? 
C14B C13B P1B 115(2) . . ? 
C22 C21 P2 113.9(12) . . ? 
C24 C23 P2 118.1(11) . . ? 
C32 C31 P3 114.7(8) . . ? 
C34 C33 P3 115.4(10) . . ? 
C42 C41 P4 117.0(10) . . ? 
C44A C43A P4 114(4) . . ? 
C44B C43B P4 109.4(13) . . ? 
C56 C51 C52 114.9(7) . . ? 
C56 C51 B 122.5(7) . . ? 
C52 C51 B 121.9(7) . . ? 
C53 C52 C51 122.8(8) . . ? 
C54 C53 C52 119.9(8) . . ? 
C54 C53 C57 120.1(8) . . ? 
C52 C53 C57 119.9(8) . . ? 
C53 C54 C55 119.5(8) . . ? 
C54 C55 C56 120.0(9) . . ? 
C54 C55 C58A 116.6(10) . . ? 
C56 C55 C58A 123.4(11) . . ? 
C54 C55 C58B 124.5(10) . . ? 
C56 C55 C58B 115.3(10) . . ? 
C55 C56 C51 122.9(8) . . ? 
F51 C57 F52 103.8(9) . . ? 
F51 C57 F53 105.6(9) . . ? 
F52 C57 F53 107.6(9) . . ? 
F51 C57 C53 114.2(8) . . ? 
F52 C57 C53 111.9(9) . . ? 
F53 C57 C53 113.0(9) . . ? 
F56A C58A F55A 108.3(10) . . ? 
F56A C58A F54A 108.5(11) . . ? 
F55A C58A F54A 108.6(10) . . ? 
F56A C58A C55 108.1(15) . . ? 
F55A C58A C55 111.0(14) . . ? 
F54A C58A C55 112.3(16) . . ? 
F55B C58B F56B 108.7(10) . . ? 
F55B C58B F54B 108.3(10) . . ? 
F56B C58B F54B 108.8(11) . . ? 
F55B C58B C55 110.2(14) . . ? 
F56B C58B C55 114.5(16) . . ? 
F54B C58B C55 106.1(16) . . ? 
C62 C61 C66 115.1(7) . . ? 
C62 C61 B 123.6(7) . . ? 
C66 C61 B 120.5(7) . . ? 
C63 C62 C61 122.9(8) . . ? 
C62 C63 C64 120.4(8) . . ? 
C62 C63 C67 119.5(8) . . ? 
C64 C63 C67 120.1(8) . . ? 
C65 C64 C63 117.9(8) . . ? 
C64 C65 C66 121.5(8) . . ? 
C64 C65 C68 119.8(8) . . ? 
C66 C65 C68 118.7(9) . . ? 
C65 C66 C61 122.2(8) . . ? 
F62 C67 F63 110.2(12) . . ? 
F62 C67 F61 105.3(10) . . ? 
F63 C67 F61 101.6(10) . . ? 
F62 C67 C63 113.6(9) . . ? 
F63 C67 C63 113.5(9) . . ? 
F61 C67 C63 111.7(9) . . ? 
F64B C68 F66B 104(3) . . ? 
F65A C68 F66A 106(2) . . ? 
F64B C68 F65B 105(2) . . ? 
F66B C68 F65B 107(2) . . ? 
F65A C68 F64A 104.8(18) . . ? 
F66A C68 F64A 106.2(16) . . ? 
F65A C68 C65 112.4(12) . . ? 
F64B C68 C65 116.2(14) . . ? 
F66B C68 C65 110.9(13) . . ? 
F66A C68 C65 112.0(12) . . ? 
F65B C68 C65 112.9(14) . . ? 
F64A C68 C65 114.3(11) . . ? 
C76 C71 C72 116.2(7) . . ? 
C76 C71 B 120.1(7) . . ? 
C72 C71 B 123.1(7) . . ? 
C73 C72 C71 121.9(8) . . ? 
C72 C73 C74 120.8(8) . . ? 
C72 C73 C77 121.2(8) . . ? 
C74 C73 C77 118.0(8) . . ? 
C75 C74 C73 117.9(8) . . ? 
C74 C75 C76 120.9(8) . . ? 
C74 C75 C78 120.0(8) . . ? 
C76 C75 C78 119.1(8) . . ? 
C71 C76 C75 122.2(8) . . ? 
F72 C77 F71 107.8(10) . . ? 
F72 C77 F73 104.3(9) . . ? 
F71 C77 F73 103.7(9) . . ? 
F72 C77 C73 114.3(8) . . ? 
F71 C77 C73 113.5(8) . . ? 
F73 C77 C73 112.3(10) . . ? 
F76 C78 F75 105.6(11) . . ? 
F76 C78 F74 103.1(9) . . ? 
F75 C78 F74 105.6(9) . . ? 
F76 C78 C75 113.5(8) . . ? 
F75 C78 C75 113.6(8) . . ? 
F74 C78 C75 114.5(9) . . ? 
C82 C81 C86 115.7(7) . . ? 
C82 C81 B 121.4(7) . . ? 
C86 C81 B 122.3(7) . . ? 
C83 C82 C81 122.7(8) . . ? 
C82 C83 C84 120.6(8) . . ? 
C82 C83 C87 120.7(8) . . ? 
C84 C83 C87 118.6(8) . . ? 
C83 C84 C85 118.7(8) . . ? 
C84 C85 C86 120.1(8) . . ? 
C84 C85 C88 119.1(8) . . ? 
C86 C85 C88 120.9(8) . . ? 
C85 C86 C81 122.2(7) . . ? 
F83A C87 F82A 105.5(15) . . ? 
F83A C87 F81A 104.8(15) . . ? 
F82A C87 F81A 100.4(13) . . ? 
F83B C87 F82B 110.7(9) . . ? 
F83B C87 F81B 110.5(10) . . ? 
F82B C87 F81B 109.6(10) . . ? 
F83A C87 C83 116.9(11) . . ? 
F82A C87 C83 115.4(9) . . ? 
F83B C87 C83 108.9(15) . . ? 
F81A C87 C83 112.1(11) . . ? 
F82B C87 C83 110.1(13) . . ? 
F81B C87 C83 106.9(13) . . ? 
F84 C88 F85 109.1(12) . . ? 
F84 C88 F86 106.5(10) . . ? 
F85 C88 F86 102.5(10) . . ? 
F84 C88 C85 114.4(8) . . ? 
F85 C88 C85 112.6(10) . . ? 
F86 C88 C85 110.9(11) . . ? 
C51 B C61 101.7(6) . . ? 
C51 B C81 113.3(6) . . ? 
C61 B C81 114.4(6) . . ? 
C51 B C71 113.1(6) . . ? 
C61 B C71 112.2(6) . . ? 
C81 B C71 102.6(6) . . ? 
 
loop_ 
 _geom_torsion_atom_site_label_1 
 _geom_torsion_atom_site_label_2 
 _geom_torsion_atom_site_label_3 
 _geom_torsion_atom_site_label_4 
 _geom_torsion 
 _geom_torsion_site_symmetry_1 
 _geom_torsion_site_symmetry_2 
 _geom_torsion_site_symmetry_3 
 _geom_torsion_site_symmetry_4 
 _geom_torsion_publ_flag 
C1 Ir1 Ir2 C3 -173.8(11) . . . . ? 
C2 Ir1 Ir2 C3 4.8(5) . . . . ? 
C4 Ir1 Ir2 C3 -178.1(7) . . . . ? 
P1B Ir1 Ir2 C3 -94.4(5) . . . . ? 
P3 Ir1 Ir2 C3 96.1(4) . . . . ? 
P1A Ir1 Ir2 C3 -80.4(5) . . . . ? 
C1 Ir1 Ir2 C4 4.3(11) . . . . ? 
C2 Ir1 Ir2 C4 -177.1(6) . . . . ? 
P1B Ir1 Ir2 C4 83.7(5) . . . . ? 
P3 Ir1 Ir2 C4 -85.8(5) . . . . ? 
P1A Ir1 Ir2 C4 97.7(5) . . . . ? 
C1 Ir1 Ir2 P4 92.0(10) . . . . ? 
C2 Ir1 Ir2 P4 -89.4(3) . . . . ? 
C4 Ir1 Ir2 P4 87.7(5) . . . . ? 
P1B Ir1 Ir2 P4 171.42(18) . . . . ? 
P3 Ir1 Ir2 P4 1.86(9) . . . . ? 
P1A Ir1 Ir2 P4 -174.64(17) . . . . ? 
C1 Ir1 Ir2 P2 -79.7(10) . . . . ? 
C2 Ir1 Ir2 P2 99.0(3) . . . . ? 
C4 Ir1 Ir2 P2 -83.9(5) . . . . ? 
P1B Ir1 Ir2 P2 -0.20(19) . . . . ? 
P3 Ir1 Ir2 P2 -169.76(11) . . . . ? 
P1A Ir1 Ir2 P2 13.75(18) . . . . ? 
C1 Ir1 P1A C13A 4.2(11) . . . . ? 
C2 Ir1 P1A C13A 118.9(11) . . . . ? 
C4 Ir1 P1A C13A -104.5(11) . . . . ? 
P3 Ir1 P1A C13A 96(3) . . . . ? 
Ir2 Ir1 P1A C13A -150.8(10) . . . . ? 
C1 Ir1 P1A C11A -120.3(10) . . . . ? 
C2 Ir1 P1A C11A -5.5(10) . . . . ? 
C4 Ir1 P1A C11A 131.1(10) . . . . ? 
P3 Ir1 P1A C11A -29(3) . . . . ? 
Ir2 Ir1 P1A C11A 84.8(9) . . . . ? 
C1 Ir1 P1A C6 116.0(6) . . . . ? 
C2 Ir1 P1A C6 -129.2(6) . . . . ? 
C4 Ir1 P1A C6 7.3(6) . . . . ? 
P3 Ir1 P1A C6 -152(3) . . . . ? 
Ir2 Ir1 P1A C6 -39.0(5) . . . . ? 
C1 Ir1 P1B C6 140.4(8) . . . . ? 
C2 Ir1 P1B C6 -105.2(7) . . . . ? 
C4 Ir1 P1B C6 31.5(7) . . . . ? 
P3 Ir1 P1B C6 89.9(15) . . . . ? 
Ir2 Ir1 P1B C6 -14.9(6) . . . . ? 
C1 Ir1 P1B C11B -105.6(11) . . . . ? 
C2 Ir1 P1B C11B 8.8(11) . . . . ? 
C4 Ir1 P1B C11B 145.5(11) . . . . ? 
P3 Ir1 P1B C11B -156.0(12) . . . . ? 
Ir2 Ir1 P1B C11B 99.2(10) . . . . ? 
C1 Ir1 P1B C13B 9.1(12) . . . . ? 
C2 Ir1 P1B C13B 123.5(12) . . . . ? 
C4 Ir1 P1B C13B -99.8(12) . . . . ? 
P3 Ir1 P1B C13B -41.3(19) . . . . ? 
Ir2 Ir1 P1B C13B -146.1(11) . . . . ? 
C3 Ir2 P2 C23 2.4(8) . . . . ? 
C4 Ir2 P2 C23 -156.4(6) . . . . ? 
P4 Ir2 P2 C23 117.1(7) . . . . ? 
Ir1 Ir2 P2 C23 -108.8(5) . . . . ? 
C3 Ir2 P2 C6 125.2(8) . . . . ? 
C4 Ir2 P2 C6 -33.5(6) . . . . ? 
P4 Ir2 P2 C6 -120.1(7) . . . . ? 
Ir1 Ir2 P2 C6 14.1(5) . . . . ? 
C3 Ir2 P2 C21 -121.9(8) . . . . ? 
C4 Ir2 P2 C21 79.4(7) . . . . ? 
P4 Ir2 P2 C21 -7.2(9) . . . . ? 
Ir1 Ir2 P2 C21 127.0(6) . . . . ? 
C1 Ir1 P3 C7 -135.0(6) . . . . ? 
C2 Ir1 P3 C7 110.2(5) . . . . ? 
C4 Ir1 P3 C7 -26.5(6) . . . . ? 
P1B Ir1 P3 C7 -84.7(13) . . . . ? 
P1A Ir1 P3 C7 133(3) . . . . ? 
Ir2 Ir1 P3 C7 19.9(4) . . . . ? 
C1 Ir1 P3 C31 103.5(5) . . . . ? 
C2 Ir1 P3 C31 -11.4(5) . . . . ? 
C4 Ir1 P3 C31 -148.1(5) . . . . ? 
P1B Ir1 P3 C31 153.7(13) . . . . ? 
P1A Ir1 P3 C31 12(3) . . . . ? 
Ir2 Ir1 P3 C31 -101.6(4) . . . . ? 
C1 Ir1 P3 C33 -14.5(6) . . . . ? 
C2 Ir1 P3 C33 -129.3(6) . . . . ? 
C4 Ir1 P3 C33 94.0(6) . . . . ? 
P1B Ir1 P3 C33 35.8(14) . . . . ? 
P1A Ir1 P3 C33 -106(3) . . . . ? 
Ir2 Ir1 P3 C33 140.4(5) . . . . ? 
C3 Ir2 P4 C43A 95.9(16) . . . . ? 
C4 Ir2 P4 C43A -105.1(15) . . . . ? 
P2 Ir2 P4 C43A -18.7(16) . . . . ? 
Ir1 Ir2 P4 C43A -153.0(15) . . . . ? 
C3 Ir2 P4 C7 -134.7(7) . . . . ? 
C4 Ir2 P4 C7 24.3(5) . . . . ? 
P2 Ir2 P4 C7 110.7(7) . . . . ? 
Ir1 Ir2 P4 C7 -23.5(4) . . . . ? 
C3 Ir2 P4 C41 -12.4(7) . . . . ? 
C4 Ir2 P4 C41 146.6(5) . . . . ? 
P2 Ir2 P4 C41 -127.0(6) . . . . ? 
Ir1 Ir2 P4 C41 98.7(4) . . . . ? 
C3 Ir2 P4 C43B 114.5(12) . . . . ? 
C4 Ir2 P4 C43B -86.5(11) . . . . ? 
P2 Ir2 P4 C43B -0.1(12) . . . . ? 
Ir1 Ir2 P4 C43B -134.4(11) . . . . ? 
C2 Ir1 C1 O1 9(100) . . . . ? 
C4 Ir1 C1 O1 -169(100) . . . . ? 
P1B Ir1 C1 O1 107(100) . . . . ? 
P3 Ir1 C1 O1 -82(100) . . . . ? 
P1A Ir1 C1 O1 94(100) . . . . ? 
Ir2 Ir1 C1 O1 -173(100) . . . . ? 
C1 Ir1 C2 O2 176(100) . . . . ? 
C4 Ir1 C2 O2 -6(25) . . . . ? 
P1B Ir1 C2 O2 87(25) . . . . ? 
P3 Ir1 C2 O2 -95(25) . . . . ? 
P1A Ir1 C2 O2 86(25) . . . . ? 
Ir2 Ir1 C2 O2 -3(25) . . . . ? 
C4 Ir2 C3 O3 0(9) . . . . ? 
P4 Ir2 C3 O3 99(8) . . . . ? 
P2 Ir2 C3 O3 -92(8) . . . . ? 
Ir1 Ir2 C3 O3 4(8) . . . . ? 
C3 Ir2 C4 C5 -169.1(17) . . . . ? 
P4 Ir2 C4 C5 91.9(19) . . . . ? 
P2 Ir2 C4 C5 -76.4(19) . . . . ? 
Ir1 Ir2 C4 C5 -174(2) . . . . ? 
C3 Ir2 C4 Ir1 4.9(17) . . . . ? 
P4 Ir2 C4 Ir1 -94.1(3) . . . . ? 
P2 Ir2 C4 Ir1 97.6(3) . . . . ? 
C1 Ir1 C4 C5 -3.5(18) . . . . ? 
C2 Ir1 C4 C5 178.8(15) . . . . ? 
P1B Ir1 C4 C5 79.7(17) . . . . ? 
P3 Ir1 C4 C5 -91.1(17) . . . . ? 
P1A Ir1 C4 C5 90.2(17) . . . . ? 
Ir2 Ir1 C4 C5 174.6(19) . . . . ? 
C1 Ir1 C4 Ir2 -178.1(5) . . . . ? 
C2 Ir1 C4 Ir2 4.2(9) . . . . ? 
P1B Ir1 C4 Ir2 -94.9(4) . . . . ? 
P3 Ir1 C4 Ir2 94.3(3) . . . . ? 
P1A Ir1 C4 Ir2 -84.4(4) . . . . ? 
Ir2 C4 C5 F1 -9(3) . . . . ? 
Ir1 C4 C5 F1 179.6(11) . . . . ? 
Ir2 C4 C5 F2 173.7(11) . . . . ? 
Ir1 C4 C5 F2 2(3) . . . . ? 
C11B P1B C6 P2 -93.1(12) . . . . ? 
C13B P1B C6 P2 161.5(11) . . . . ? 
Ir1 P1B C6 P2 28.4(11) . . . . ? 
C23 P2 C6 P1B 100.7(9) . . . . ? 
C21 P2 C6 P1B -149.0(9) . . . . ? 
Ir2 P2 C6 P1B -26.8(10) . . . . ? 
C23 P2 C6 P1A 82.1(8) . . . . ? 
C21 P2 C6 P1A -167.6(8) . . . . ? 
Ir2 P2 C6 P1A -45.5(8) . . . . ? 
C13A P1A C6 P2 -178.5(11) . . . . ? 
C11A P1A C6 P2 -71.8(11) . . . . ? 
Ir1 P1A C6 P2 57.1(8) . . . . ? 
C31 P3 C7 P4 86.3(7) . . . . ? 
C33 P3 C7 P4 -168.4(7) . . . . ? 
Ir1 P3 C7 P4 -40.8(7) . . . . ? 
C43A P4 C7 P3 171.4(15) . . . . ? 
C41 P4 C7 P3 -84.3(7) . . . . ? 
C43B P4 C7 P3 166.0(10) . . . . ? 
Ir2 P4 C7 P3 42.6(7) . . . . ? 
C13A P1A C11A C12A -55(2) . . . . ? 
C6 P1A C11A C12A -160.2(17) . . . . ? 
Ir1 P1A C11A C12A 77.4(19) . . . . ? 
C11A P1A C13A C14A -161(2) . . . . ? 
C6 P1A C13A C14A -48(2) . . . . ? 
Ir1 P1A C13A C14A 68(2) . . . . ? 
C6 P1B C11B C12B -165(2) . . . . ? 
C13B P1B C11B C12B -53(3) . . . . ? 
Ir1 P1B C11B C12B 68(2) . . . . ? 
C6 P1B C13B C14B 39(3) . . . . ? 
C11B P1B C13B C14B -64(3) . . . . ? 
Ir1 P1B C13B C14B 175(2) . . . . ? 
C23 P2 C21 C22 -62.5(16) . . . . ? 
C6 P2 C21 C22 -172.6(15) . . . . ? 
Ir2 P2 C21 C22 66.2(16) . . . . ? 
C6 P2 C23 C24 50.3(14) . . . . ? 
C21 P2 C23 C24 -54.6(14) . . . . ? 
Ir2 P2 C23 C24 176.9(11) . . . . ? 
C7 P3 C31 C32 165.7(9) . . . . ? 
C33 P3 C31 C32 58.4(11) . . . . ? 
Ir1 P3 C31 C32 -68.0(10) . . . . ? 
C7 P3 C33 C34 58.3(13) . . . . ? 
C31 P3 C33 C34 166.8(12) . . . . ? 
Ir1 P3 C33 C34 -67.7(13) . . . . ? 
C43A P4 C41 C42 67.8(18) . . . . ? 
C7 P4 C41 C42 -48.5(10) . . . . ? 
C43B P4 C41 C42 53.4(13) . . . . ? 
Ir2 P4 C41 C42 -174.5(7) . . . . ? 
C7 P4 C43A C44A -69(3) . . . . ? 
C41 P4 C43A C44A -180(3) . . . . ? 
Ir2 P4 C43A C44A 61(3) . . . . ? 
C7 P4 C43B C44B 171.9(17) . . . . ? 
C41 P4 C43B C44B 62.7(19) . . . . ? 
Ir2 P4 C43B C44B -67.9(19) . . . . ? 
C56 C51 C52 C53 -1.0(13) . . . . ? 
B C51 C52 C53 169.9(8) . . . . ? 
C51 C52 C53 C54 2.2(15) . . . . ? 
C51 C52 C53 C57 -173.4(9) . . . . ? 
C52 C53 C54 C55 -1.7(17) . . . . ? 
C57 C53 C54 C55 173.9(11) . . . . ? 
C53 C54 C55 C56 0.2(18) . . . . ? 
C53 C54 C55 C58A 179.5(12) . . . . ? 
C53 C54 C55 C58B -174.6(14) . . . . ? 
C54 C55 C56 C51 1.0(18) . . . . ? 
C58A C55 C56 C51 -178.2(12) . . . . ? 
C58B C55 C56 C51 176.3(12) . . . . ? 
C52 C51 C56 C55 -0.6(14) . . . . ? 
B C51 C56 C55 -171.4(10) . . . . ? 
C54 C53 C57 F51 148.4(10) . . . . ? 
C52 C53 C57 F51 -36.0(14) . . . . ? 
C54 C53 C57 F52 -94.0(12) . . . . ? 
C52 C53 C57 F52 81.6(12) . . . . ? 
C54 C53 C57 F53 27.7(15) . . . . ? 
C52 C53 C57 F53 -156.7(10) . . . . ? 
C54 C55 C58A F56A 74.5(17) . . . . ? 
C56 C55 C58A F56A -106.3(15) . . . . ? 
C54 C55 C58A F55A -44.1(19) . . . . ? 
C56 C55 C58A F55A 135.2(15) . . . . ? 
C54 C55 C58A F54A -165.8(15) . . . . ? 
C56 C55 C58A F54A 13.4(19) . . . . ? 
C54 C55 C58B F55B -11(2) . . . . ? 
C56 C55 C58B F55B 173.8(14) . . . . ? 
C54 C55 C58B F56B 111.7(17) . . . . ? 
C56 C55 C58B F56B -63.4(18) . . . . ? 
C54 C55 C58B F54B -128.2(16) . . . . ? 
C56 C55 C58B F54B 56.8(17) . . . . ? 
C66 C61 C62 C63 -1.3(12) . . . . ? 
B C61 C62 C63 168.3(8) . . . . ? 
C61 C62 C63 C64 1.3(13) . . . . ? 
C61 C62 C63 C67 -177.7(8) . . . . ? 
C62 C63 C64 C65 -1.0(13) . . . . ? 
C67 C63 C64 C65 178.0(9) . . . . ? 
C63 C64 C65 C66 0.9(13) . . . . ? 
C63 C64 C65 C68 -177.8(9) . . . . ? 
C64 C65 C66 C61 -1.0(13) . . . . ? 
C68 C65 C66 C61 177.7(8) . . . . ? 
C62 C61 C66 C65 1.2(11) . . . . ? 
B C61 C66 C65 -168.8(7) . . . . ? 
C62 C63 C67 F62 -56.6(14) . . . . ? 
C64 C63 C67 F62 124.3(12) . . . . ? 
C62 C63 C67 F63 176.4(11) . . . . ? 
C64 C63 C67 F63 -2.6(16) . . . . ? 
C62 C63 C67 F61 62.3(13) . . . . ? 
C64 C63 C67 F61 -116.8(11) . . . . ? 
C64 C65 C68 F65A -145(3) . . . . ? 
C66 C65 C68 F65A 36(3) . . . . ? 
C64 C65 C68 F64B 160(4) . . . . ? 
C66 C65 C68 F64B -19(4) . . . . ? 
C64 C65 C68 F66B -82(3) . . . . ? 
C66 C65 C68 F66B 100(3) . . . . ? 
C64 C65 C68 F66A 95(3) . . . . ? 
C66 C65 C68 F66A -83(3) . . . . ? 
C64 C65 C68 F65B 38(4) . . . . ? 
C66 C65 C68 F65B -141(3) . . . . ? 
C64 C65 C68 F64A -26(2) . . . . ? 
C66 C65 C68 F64A 155.7(19) . . . . ? 
C76 C71 C72 C73 -1.0(12) . . . . ? 
B C71 C72 C73 170.0(8) . . . . ? 
C71 C72 C73 C74 1.0(13) . . . . ? 
C71 C72 C73 C77 -178.8(9) . . . . ? 
C72 C73 C74 C75 -0.7(13) . . . . ? 
C77 C73 C74 C75 179.1(9) . . . . ? 
C73 C74 C75 C76 0.6(12) . . . . ? 
C73 C74 C75 C78 -176.8(8) . . . . ? 
C72 C71 C76 C75 0.9(11) . . . . ? 
B C71 C76 C75 -170.4(7) . . . . ? 
C74 C75 C76 C71 -0.7(12) . . . . ? 
C78 C75 C76 C71 176.6(8) . . . . ? 
C72 C73 C77 F72 14.4(15) . . . . ? 
C74 C73 C77 F72 -165.3(10) . . . . ? 
C72 C73 C77 F71 138.6(10) . . . . ? 
C74 C73 C77 F71 -41.1(14) . . . . ? 
C72 C73 C77 F73 -104.2(11) . . . . ? 
C74 C73 C77 F73 76.1(11) . . . . ? 
C74 C75 C78 F76 -122.0(11) . . . . ? 
C76 C75 C78 F76 60.6(13) . . . . ? 
C74 C75 C78 F75 117.4(11) . . . . ? 
C76 C75 C78 F75 -60.0(13) . . . . ? 
C74 C75 C78 F74 -4.0(14) . . . . ? 
C76 C75 C78 F74 178.6(9) . . . . ? 
C86 C81 C82 C83 -2.8(11) . . . . ? 
B C81 C82 C83 -174.1(7) . . . . ? 
C81 C82 C83 C84 1.9(13) . . . . ? 
C81 C82 C83 C87 179.7(8) . . . . ? 
C82 C83 C84 C85 0.8(13) . . . . ? 
C87 C83 C84 C85 -177.0(9) . . . . ? 
C83 C84 C85 C86 -2.5(13) . . . . ? 
C83 C84 C85 C88 176.7(10) . . . . ? 
C84 C85 C86 C81 1.6(13) . . . . ? 
C88 C85 C86 C81 -177.6(10) . . . . ? 
C82 C81 C86 C85 1.0(11) . . . . ? 
B C81 C86 C85 172.3(8) . . . . ? 
C82 C83 C87 F83A -128(3) . . . . ? 
C84 C83 C87 F83A 50(3) . . . . ? 
C82 C83 C87 F82A -2.7(18) . . . . ? 
C84 C83 C87 F82A 175.2(15) . . . . ? 
C82 C83 C87 F83B 48(3) . . . . ? 
C84 C83 C87 F83B -134(3) . . . . ? 
C82 C83 C87 F81A 111(2) . . . . ? 
C84 C83 C87 F81A -71(2) . . . . ? 
C82 C83 C87 F82B 170(3) . . . . ? 
C84 C83 C87 F82B -12(3) . . . . ? 
C82 C83 C87 F81B -71(3) . . . . ? 
C84 C83 C87 F81B 107(3) . . . . ? 
C84 C85 C88 F84 -158.0(11) . . . . ? 
C86 C85 C88 F84 21.3(17) . . . . ? 
C84 C85 C88 F85 -32.6(16) . . . . ? 
C86 C85 C88 F85 146.6(11) . . . . ? 
C84 C85 C88 F86 81.5(13) . . . . ? 
C86 C85 C88 F86 -99.3(11) . . . . ? 
C56 C51 B C61 92.2(9) . . . . ? 
C52 C51 B C61 -78.0(9) . . . . ? 
C56 C51 B C81 -31.1(11) . . . . ? 
C52 C51 B C81 158.7(7) . . . . ? 
C56 C51 B C71 -147.3(8) . . . . ? 
C52 C51 B C71 42.5(10) . . . . ? 
C62 C61 B C51 -86.5(8) . . . . ? 
C66 C61 B C51 82.6(8) . . . . ? 
C62 C61 B C81 36.1(10) . . . . ? 
C66 C61 B C81 -154.9(7) . . . . ? 
C62 C61 B C71 152.4(7) . . . . ? 
C66 C61 B C71 -38.6(9) . . . . ? 
C82 C81 B C51 -35.9(10) . . . . ? 
C86 C81 B C51 153.3(7) . . . . ? 
C82 C81 B C61 -151.9(7) . . . . ? 
C86 C81 B C61 37.3(10) . . . . ? 
C82 C81 B C71 86.3(8) . . . . ? 
C86 C81 B C71 -84.4(8) . . . . ? 
C76 C71 B C51 -152.7(7) . . . . ? 
C72 C71 B C51 36.6(10) . . . . ? 
C76 C71 B C61 -38.4(9) . . . . ? 
C72 C71 B C61 151.0(7) . . . . ? 
C76 C71 B C81 84.9(8) . . . . ? 
C72 C71 B C81 -85.8(8) . . . . ? 
 
_diffrn_measured_fraction_theta_max    0.998 
_diffrn_reflns_theta_full              26.58 
_diffrn_measured_fraction_theta_full   0.998 
_refine_diff_density_max    4.877 
_refine_diff_density_min   -4.932 
_refine_diff_density_rms    0.153 

#===END
